# Supplementary material
Source: ML conference proceedings conference paper supplement (https://openreview.net/forum?id=a30kyHbuXfI)
Supplement: supplementary_material [file All_models.xls]

## Sheet: garch_100
w	alpha_1	tr_lb	tr_ll	tr_mse	te_lb	te_ll	te_mse
0.518629	0.640169	-2247.14	2241.03	29.8183	-651.11	645.747	5.4467
0.51865	0.64016	-2247.14	2241.03	29.8182	-651.107	645.745	5.44666
0.518662	0.639891	-2247.14	2241.03	29.8153	-651.105	645.744	5.44541
0.519346	0.628169		2241.01	29.6941		645.661	5.39096
0.51883	0.64033		2241.04	29.82		645.726	5.44749

## Sheet: garch_101
w	alpha_1	beta_1	tr_lb	tr_ll	tr_mse	te_lb	te_ll	te_mse
0.0427725	0.230372	0.73661	-2012.4	2002.56	25.6907	-607.696	598.678	3.95337
0.0427289	0.230441	0.736719	-2012.4	2002.56	25.6927	-607.69	598.673	3.95363
0.0427657	0.230286	0.736658	-2012.41	2002.56	25.6907	-607.7	598.678	3.95316
0.0420801	0.22637	0.738296		2002.52	25.6831		598.918	3.94359
0.042668	0.231342	0.738357		2002.67	25.7228		598.433	3.95737

## Sheet: garch_111
w	alpha_1	gamma_1	beta_1	tr_lb	tr_ll	tr_mse	te_lb	te_ll	te_mse
0.0436166	0.107871	0.291659	0.721313	-1988.72	1976.07	27.1934	-604.577	592.924	4.48873
0.0435811	0.108023	0.292049	0.721266	-1988.72	1976.08	27.2088	-604.588	592.927	4.49152
0.0436169	0.107957	0.291617	0.721302	-1988.71	1976.08	27.195	-604.573	592.923	4.48898
0.0423834	0.10767	0.28919	0.722384		1976.03	27.1431		593.289	4.47596
0.0433649	0.108425	0.295904	0.723653		1976.26	27.4278		592.546	4.52195

## Sheet: garch_112
w	alpha_1	gamma_1	beta_1	beta_2	tr_lb	tr_ll	tr_mse	te_lb	te_ll	te_mse
0.0448689	0.113584	0.315279	0.656393	0.0492395	-1988.46	1976.05	27.5739	-604.286	593.505	4.58933
0.0449205	0.113769	0.315644	0.655913	0.0493466	-1988.45	1976.05	27.5793	-604.281	593.526	4.59133
0.0449194	0.11364	0.31536	0.655506	0.0498138	-1988.45	1976.05	27.5682	-604.287	593.524	4.58907
0.0437258	0.110272	0.300876	0.672157	0.0409283		1976.01	27.2675		593.377	4.51511
0.0446092	0.115051	0.320432	0.668486	0.0359788		1976.12	27.7431		593.749	4.62685

## Sheet: gjr_111
w	alpha_1	gamma_1	beta_1	tr_lb	tr_ll	tr_mse	te_lb	te_ll	te_mse
0.0435803	0.107959	0.292139	0.721407	-1988.71	1976.08	27.2139	-604.563	592.906	4.49203
0.0435512	0.108283	0.292868	0.721278	-1988.7	1976.09	27.2431	-604.559	592.905	4.49741
0.0435598	0.108209	0.293002	0.721115	-1988.7	1976.08	27.2385	-604.585	592.926	4.49723
0.0423834	0.10767	0.28919	0.722384		1976.03	27.1431		593.289	4.47596
0.0434389	0.109131	0.293967	0.723376		1976.24	27.3862		592.579	4.51475

## Sheet: gjr_112
w	alpha_1	gamma_1	beta_1	beta_2	tr_lb	tr_ll	tr_mse	te_lb	te_ll	te_mse
0.0446283	0.115714	0.323089	0.654536	0.04878	-1988.39	1976.12	27.8157	-604.333	593.675	4.63817
0.044647	0.115271	0.321739	0.65346	0.0501613	-1988.38	1976.1	27.7672	-604.321	593.654	4.62846
0.044666	0.115558	0.322698	0.653346	0.0499656	-1988.39	1976.11	27.7975	-604.347	593.664	4.63468
0.0437258	0.110272	0.300876	0.672157	0.0409283		1976.01	27.2675		593.377	4.51511
0.0443804	0.114204	0.320971	0.669617	0.0362792		1976.12	27.7781		593.628	4.6289

## Sheet: egarch_101
w	alpha_1	beta_1	tr_lb	tr_ll	tr_mse	te_lb	te_ll	te_mse
-0.00332742	0.414223	0.929165	-2033.15	2017.67	26.8396	-613.73	599.432	3.93112
-0.00334486	0.41611	0.928615	-2033.16	2017.69	26.8367	-613.678	599.444	3.93285
-0.00334288	0.416267	0.928564	-2033.16	2017.69	26.8367	-613.671	599.444	3.93299
-0.00320265	0.406309	0.931567		2017.64	26.8575		599.374	3.92278
-0.00312886	0.415293	0.929184		2017.68	26.8194		599.444	3.93227

## Sheet: egarch_111
w	alpha_1	gamma_1	beta_1	tr_lb	tr_ll	tr_mse	te_lb	te_ll	te_mse
-0.0149402	0.350284	-0.171229	0.929576	-1995.54	1974.97	26.1927	-608.059	589.076	4.12822
-0.0152177	0.364154	-0.174198	0.926155	-1995.69	1975.21	26.2307	-608.097	589.579	4.17068
-0.0152571	0.363975	-0.174163	0.926134	-1995.69	1975.21	26.2336	-608.093	589.574	4.17004
-0.0147523	0.339942	-0.169262	0.932332		1974.92	26.1652		588.652	4.09396
-0.0152028	0.35032	-0.171514	0.929311		1974.98	26.2078		589.091	4.12887

## Sheet: egarch_112
w	alpha_1	gamma_1	beta_1	beta_2	tr_lb	tr_ll	tr_mse	te_lb	te_ll	te_mse
-0.0149214	0.35495	-0.172641	0.917286	0.0113746	-1998.67	1975.03	26.2345	-610.848	589.168	4.14285
-0.0156848	0.394921	-0.185245	0.85864	0.0612969	-1999.55	1976	26.5718	-611.098	590.33	4.29081
-0.0156317	0.394941	-0.185703	0.855223	0.0646547	-1999.55	1976.01	26.5894	-611.083	590.299	4.29285
-0.0146669	0.335267	-0.166342	0.954592	-0.0215665		1974.9	26.1127		588.628	4.0777
-0.014903	0.350787	-0.170808	0.925207	0.00420037		1974.99	26.2139		589.072	4.12751

## Sheet: figarch_100
w	phi_1	d_1	tr_lb	tr_ll	tr_mse	te_lb	te_ll	te_mse
0.0891057	0.00541205	0.305623	-2021.39	2012.92	26.0086	-610.683	603	4.1366
0.0890934	0.00523584	0.305612	-2021.39	2012.91	26.0084	-610.699	602.99	4.13615
0.0891151	0.00545034	0.30569	-2021.39	2012.93	26.0082	-610.691	603.002	4.13682
0.0869119	5.24671e-09	0.306296		2012.43	25.9966		602.847	4.1255
0.0891008	0.00558913	0.305288		2012.94	26.0112		603.009	4.13638

[truncated: 2 more sheets: figarch_001, figarch_101]
