# Supplementary material
Source: ML conference proceedings conference paper supplement (https://openreview.net/forum?id=a30kyHbuXfI)
Supplement: supplementary_material [file attachment]

## Sheet: orjinal data
	TL BASED	USD BASED	imkb_x
date	ISE	ISE	SP	DAX	FTSE	NIKKEI	BOVESPA	EU	EM
2009-01-05	0.0357537	0.0383762	-0.00467931	0.00219342	0.00389438	0	0.0311902	0.012698	0.0285245
2009-01-06	0.0254259	0.0318127	0.00778674	0.00845534	0.0128656	0.00416245	0.0189196	0.0113407	0.00877264
2009-01-07	-0.0288617	-0.026353	-0.0304691	-0.0178331	-0.0287346	0.0172929	-0.0358986	-0.0170728	-0.0200154
2009-01-08	-0.0622081	-0.0847159	0.00339136	-0.0117263	-0.000465999	-0.0400613	0.0282832	-0.00556096	-0.0194238
2009-01-09	0.00985991	0.00965811	-0.0215332	-0.0198728	-0.0127097	-0.0044735	-0.00976388	-0.0109886	-0.00780221
2009-01-12	-0.029191	-0.0423612	-0.0228226	-0.0135257	-0.00502553	-0.0490385	-0.0538495	-0.0124513	-0.0226297
2009-01-13	0.0154453	-0.000272183	0.00175655	-0.0176736	-0.00614145	0	0.00357202	-0.0122202	-0.00482714
2009-01-14	-0.0411676	-0.0355525	-0.0340325	-0.0473834	-0.0509452	0.00291235	-0.0403016	-0.0452202	-0.00867665
2009-01-15	0.000661905	-0.0172678	0.0013283	-0.0195506	-0.0143347	-0.0504476	0.0303136	-0.0120704	-0.0234287
2009-01-16	0.0220373	0.032278	0.00753313	0.00679078	0.00628918	0.0254532	0.00486669	0.00856086	0.0109169
2009-01-19	-0.0226925	-0.0443488	-0.054262	-0.0115499	-0.0093513	0.00323892	-0.013151	-0.0120452	-0.004029
2009-01-20	-0.0137087	-0.0296614	0	-0.0178336	-0.00417079	-0.0234115	-0.0408993	-0.015088	-0.0241072
2009-01-21	0.000864697	0.00152943	0.042572	0.00501119	-0.00772887	-0.0205613	0.0335321	-0.00333856	-0.00509224
2009-01-22	-0.00381506	0.00504316	-0.0152785	-0.0098414	-0.0018984	0.0188179	-0.0169817	-0.00655222	-0.00322725
2009-01-23	0.00566126	-0.010008	0.00536324	-0.00964005	7.40311e-05	-0.0388085	0.00626104	-0.00362006	-0.00807732
2009-01-26	0.0468313	0.0617082	0.00553786	0.0347868	0.0378911	-0.0081816	0.00983816	0.0327996	0.0103197
2009-01-27	-0.00663498	0.0109487	0.0108663	-0.000797661	-0.00347479	0.0481481	0.00492178	-0.00264181	0.0063445
2009-01-28	0.034567	0.0358709	0.0330068	0.044182	0.0237478	0.005594	0.0387247	0.0299742	0.0221041
2009-01-29	-0.0205282	-0.0202718	-0.0336811	-0.0202559	-0.0247735	0.0177232	-0.0147502	-0.0231086	0.000408697
2009-01-30	-0.0087767	-0.0234583	-0.0230528	-0.0204788	-0.00971266	-0.031666	-0.00853829	-0.0072013	0.00224254
2009-02-02	-0.0259191	-0.0356075	-0.000532907	-0.0156367	-0.0174543	-0.0151339	-0.0162893	-0.0197393	-0.0190914
2009-02-03	0.0152795	0.0224028	0.0157099	0.02404	0.0210386	-0.00617474	0.0275737	0.0178623	0.0127187
2009-02-04	0.0185778	0.0232308	-0.00751766	0.0265765	0.0152747	0.0269083	0.0095649	0.01877	0.0151656
2009-02-05	-0.0141329	-0.0145714	0.0162332	0.00393191	7.0943e-05	-0.0111693	0.0241278	-0.00413909	0.00207251
2009-02-06	0.036607	0.0427589	0.0265407	0.0293059	0.0147876	0.0158456	0.0392825	0.0191267	0.0323381
2009-02-09	0.0113532	0.0214676	0.00148405	0.00476618	0.00365138	-0.0134107	-0.0154618	0.00562716	0.00789539
2009-02-10	-0.040542	-0.0439069	-0.0503686	-0.0351701	-0.0221822	-0.00290167	-0.0214396	-0.0243878	-0.0021391
2009-02-11	-0.0221056	-0.0338935	0.00792346	0.00543406	0.00501931	-0.0307449	-0.00879925	0.00109742	-0.007926
2009-02-12	-0.0148884	-0.020825	0.00173764	-0.0274206	-0.00760983	0	-0.00848223	-0.0140922	-0.0147727
2009-02-13	0.00702675	0.0097092	-0.010048	0.00132185	-0.00300293	0.00956302	0.0285508	0.00303193	0.0177644
2009-02-16	-0.011495	-0.0246291	-0.0466294	-0.045614	-0.0131663	-0.00376444	0.00399929	-0.0127217	-0.00685044
2009-02-17	-0.041136	-0.0506875	0	0	-0.0246557	-0.0135962	-0.0488296	-0.030935	-0.0383228
2009-02-18	-0.0026315	-0.0121011	-0.000950817	-0.00276434	-0.00679031	-0.014634	-0.00435106	-0.0033031	-0.00334226
2009-02-19	0.0246546	0.0329232	-0.0120969	0.00243463	0.0028909	0.00307579	0.00141051	0.00256948	0.0067645
2009-02-20	-0.0358406	-0.0497757	-0.0114786	-0.0487468	-0.032706	-0.0188692	-0.0258794	-0.037924	-0.0272944
2009-02-23	0.0173032	0.0295662	-0.0353154	-0.0196734	-0.00992282	-0.00543789	-0.0125543	-0.0121596	0.00967787
2009-02-24	0.00172541	-0.00415165	0.0393201	-0.0103931	-0.00894738	-0.014695	0	-0.00944703	-0.0118811
2009-02-25	0.00497585	0.0101978	-0.010715	-0.012798	0.0085058	0.0261607	0	-0.000994183	0.00609936
2009-02-26	0.000671759	-0.000812008	-0.0159057	0.0247572	0.0171552	-0.000441044	-0.00136104	0.0209026	-0.00233116
2009-02-27	-0.0058919	-0.00951845	-0.0238465	-0.0253996	-0.0220777	0.0147064	7.85721e-05	-0.0182614	-0.00615013
2009-03-02	-0.013689	-0.031324	-0.0477419	-0.0353951	-0.054816	-0.0388329	-0.0523649	-0.0488168	-0.0353649
2009-03-03	0.00219296	0.00412295	-0.00642739	-0.00522918	-0.0318608	-0.00695116	0.00640966	-0.0202991	0.00129031
2009-03-04	0.00791321	0.00272274	0.0234754	0.0528292	0.0373891	0.00843492	0.0516744	0.0365485	0.0303115
2009-03-05	-0.0385222	-0.0433816	-0.0434633	-0.0515376	-0.0323337	0.0193602	-0.0272681	-0.0374652	-0.00867184
2009-03-06	0.0079588	-0.0192349	0.00121529	-0.00790018	0.00022661	-0.0356575	-0.00708975	-0.011172	-0.00209765
2009-03-09	-0.00713347	-0.016437	-0.0100743	0.00696346	0.00330831	-0.0122127	-0.00985843	-0.000177944	-0.00555836
2009-03-10	0.011234	0.0218827	0.0617187	0.0514561	0.047628	-0.00439149	0.0543981	0.0504593	0.02491
2009-03-11	-0.00141036	0.0244324	0.00244282	0.00695291	-0.00577677	0.044514	0.000257732	0.00395046	0.0128157
2009-03-12	0.0109744	0.00274191	0.0399211	0.0107036	0.00494202	-0.0244098	0.0089024	0.00980119	0.00541947
2009-03-13	0.00321325	0.0340667	0.00770924	-0.000662468	0.0111443	0.05026	-0.00350532	0.00619388	0.0186892
2009-03-16	0.000214245	0.00560948	-0.00352216	0.0227413	0.0289609	0.0176612	-0.0105126	0.0266777	0.0102539
2009-03-17	-0.00711875	-0.0136301	0.0316343	-0.0141356	-0.00178731	0.0313033	0.0231455	-0.00568371	0.00268869
2009-03-18	0.0018918	-0.000881369	0.0206434	0.00214176	-0.0135996	0.00289424	0.0158441	-0.00420478	0.00601251
2009-03-19	0.0198742	0.0308887	-0.0130641	0.0117268	0.00312258	-0.0032931	0.00771764	0.00702835	0.00984727
2009-03-20	0.0029187	-0.000951721	-0.0199674	0.00623261	0.00678871	0.0333626	-0.00936315	0.003375	-0.00665435
2009-03-23	0.0359681	0.0513307	0.0683664	0.0261091	0.0281969	0	0.0572901	0.0283794	0.0441216
2009-03-24	0.00329842	0.011894	-0.0206264	0.00262802	-0.0105033	0.0326625	-0.0229528	-0.0039239	0.00229605
2009-03-25	0.0211651	0.014858	0.00958032	0.00854398	-0.00286746	-0.000979474	0.00775747	0.00712586	0.00830965
2009-03-26	-0.00496839	0.00054608	0.0230526	0.00850682	0.00636383	0.0182685	0.0187236	0.0045644	0.0164176
2009-03-27	0.0112479	0.00640804	-0.0205247	-0.0131919	-0.00672284	-0.00108438	-0.0161431	-0.0131921	-0.00673086
2009-03-30	-0.0217802	-0.0405766	-0.0354394	-0.0523312	-0.0355045	-0.0463688	-0.0303802	-0.0395754	-0.0385645
2009-03-31	0.0244066	0.0362165	0.0130442	0.0236647	0.0424566	-0.0154846	0.00669292	0.0339053	0.00783422
2009-04-01	0.00691341	0.019587	0.016421	0.0112735	0.00748573	0.0294503	0.0253325	0.013131	0.0153395
2009-04-02	0.0314018	0.0525224	0.0283222	0.0589505	0.0419337	0.0431038	0.0410735	0.0462999	0.0385062
2009-04-03	-0.00524736	0.0108959	0.00968473	0.000700361	-0.0233741	0.00344141	0.0148652	-0.0135659	0.00431152
2009-04-06	0.000735712	0.0186135	-0.00836725	-0.00805518	-0.00902389	0.0122777	-0.00505884	-0.00663938	0.00419193
2009-04-07	-0.0102976	-0.0350282	-0.0241437	-0.00629823	-0.0159014	-0.00283538	-0.00777347	-0.0109735	-0.00556586
2009-04-08	0.0472389	0.0460461	0.0117146	0.00816094	-0.00127291	-0.0272959	0.00811304	0.00457624	-0.00750108
2009-04-09	0.0317777	0.0515575	0.0373471	0.0301072	0.0147173	0.0366723	0.0302516	0.0203502	0.0276959
2009-04-10	0.0101707	0.0146486	0.00253019	0	0.00132954	0.00537468	0.00989837	0	0.005386
2009-04-13	-0.0136613	-0.0184581	0	0	0	-0.00443637	0	0	0.00587964
2009-04-14	-0.0101114	-0.00921981	-0.0202685	0.0145646	0	-0.00920246	-0.012559	0.0104106	0.00741411
2009-04-15	0.0057888	-0.00727192	0.0124709	-0.00158563	-0.00517758	-0.0113412	-0.00319767	-0.00569206	0.00271128
2009-04-16	0.041455	0.0371139	0.0154193	0.0130296	0.0210944	0.00140586	0.0164739	0.0196792	0.00243869
2009-04-17	-0.00261798	-0.00644089	0.00495707	0.014512	0.00977199	0.0172479	-0.0053811	0.0150008	-0.00552592
2009-04-20	-0.0309548	-0.0435617	-0.0437323	-0.0415944	-0.0252126	0.00192572	-0.0298212	-0.0331451	-0.00835785
2009-04-21	0.00454821	-0.0139764	0.0210294	0.00341124	-0.000852301	-0.0242038	0.0101881	0.000107111	-0.00727657
2009-04-22	0.00965595	0.0179867	-0.00771129	0.020403	0.0107756	0.00183157	0	0.0142466	-0.000966672
2009-04-24	0.024517	0.0414637	0.0265313	0.0172412	0.030613	-0.00221505	0.0411142	0.0197327	0.0229151
2009-04-27	-0.00416292	-0.00776554	-0.0101176	0.00421631	0.00264328	0.00210504	-0.0205641	0.00119383	-0.0187367
2009-04-28	-0.012368	-0.0212445	-0.00274426	-0.018632	-0.0170878	-0.0270131	2.18243e-05	-0.016192	-0.013224
2009-04-29	0.0519803	0.0730054	0.0213798	0.0208642	0.0224967	0.038625	0.0302233	0.0212245	0.0258124
2009-04-30	0.0290227	0.040498	-0.0009505	0.0136987	0.0128303	0	0.00133309	0.0133644	0.0164448
2009-05-04	0.0162611	0.0156193	0.0386891	0.0275041	0.0217243	0.0612293	0.0637915	0.0156414	0.0478045
2009-05-05	0.0258823	0.0424922	-0.00379893	-0.0101318	0	0	0.00524364	0.00472239	0.00403583
2009-05-06	0.0210611	0.01554	0.0172546	0.00568745	0.013649	0	0.0162284	0.0127287	0.0117374
2009-05-07	-0.026273	-0.0116927	-0.0132903	-0.015821	0.000500273	0	-0.0283801	-0.00523412	-0.00246741
2009-05-08	-0.00112387	-0.00591825	0.0237839	0.0225982	0.0143105	0.0050089	0.026378	0.0168389	0.0103309
2009-05-11	-0.0185414	-0.0184132	-0.0217472	-0.00960869	-0.00597916	0.00202809	-0.00820542	-0.0118346	-0.00557936
2009-05-12	0.0257567	0.0204679	-0.000979319	-0.00263347	-0.00225708	-0.0163593	-0.0128331	-0.0041182	-0.00224502
2009-05-13	-0.00650899	-0.000703323	-0.0272632	-0.026406	-0.0214925	0.00449379	-0.0332741	-0.024443	-0.0106736
2009-05-14	0.00807057	-0.00836451	0.0102984	0.00229451	0.00717739	-0.0267735	0.0156334	0.00439354	-0.011305
2009-05-15	0.0117034	0.0190548	-0.0114757	-0.000204728	-0.00332924	0.0186609	-0.00891802	0.002504	0.00816049
2009-05-18	0.00540756	0.00829457	0.0299366	0.0238732	0.0223783	-0.0247318	0.0489	0.0213451	0.027348
2009-05-20	0.0428407	0.0612849	-0.00688296	0.037813	0.00491313	0.0332887	-0.00424505	0.0175559	0.0234053
2009-05-21	-0.0119998	-0.0120659	-0.0168996	-0.0278238	-0.0278896	-0.0086508	-0.0228566	-0.020869	-0.0170319
2009-05-22	0.00843053	0.00855953	-0.00149831	0.0036825	0.00454609	-0.00414712	0.00955747	-0.000809664	0.00213008
2009-05-25	0.0111665	0.00281208	0.0259622	-6.0993e-05	0.0105732	0.0130504	0.0048923	0.00163058	0.000841483
2009-05-26	-0.0155726	-0.0220491	0	0.0135603	0	-0.00387935	0.0199701	0.00693029	-0.0053315
2009-05-27	0.00880123	0.00608937	-0.0191534	0.00303814	0.0010195	0.0136496	-0.000945645	0.00359613	0.0163607
2009-05-28	-0.00420917	-0.00946971	0.0153012	-0.0136689	-0.00652001	0.00133615	0.0238295	-0.00932009	0.00858289
2009-05-29	-0.000514681	0.0174513	0.0134834	0.00160831	0.00690488	0.0074956	0.0029556	0.00272753	0.00776075
2009-06-01	0.0281313	0.036776	0.02549	0.0400197	0.0197898	0.016172	0.023923	0.0229885	0.0299783
2009-06-02	-0.00779243	-0.0104236	0.00198134	0.000291641	-0.00650105	0.00274068	-0.00895974	0.000450926	-0.00663054
2009-06-03	-0.0223624	-0.0203928	-0.0138345	-0.0175578	-0.0211285	0.00384244	-0.0360686	-0.0191999	-0.0130267
2009-06-04	-0.019172	-0.026503	0.0114182	0.00202978	0.000798148	-0.00749181	0.0260931	0.00119866	-0.00128365
2009-06-05	0.0139471	0.0142071	-0.00251786	0.00241179	0.0117162	0.010192	-0.00230326	0.00625536	0.0071952
2009-06-08	-0.0320059	-0.0432971	-0.00101105	-0.014345	-0.00755335	0.00994424	0.00540335	-0.0100882	-0.0105369
2009-06-09	0.00447836	0.00667069	0.00349708	-0.00137165	-9.08059e-05	-0.00802042	-0.00885881	0.00224752	-0.00514889
2009-06-10	0.0170891	0.0267133	-0.00348643	0.0106121	0.00723854	0.0206971	0.00476692	0.00956358	0.0196234
2009-06-11	0.00967985	0.00641436	0.00609331	0.0110412	0.00564129	-0.00101738	0.00274846	0.00760794	0.00288859
2009-06-12	0.00267096	0.00868244	0.00139601	-0.00747215	-0.00446996	0.0153593	0	-0.00336015	-0.00218022
2009-06-15	-0.00362379	-0.0109354	-0.0240555	-0.0360109	-0.0264614	-0.00953144	-0.0288678	-0.0266077	-0.0211093
2009-06-16	-0.00444129	-0.00411553	-0.0128019	0.000159498	0.000600837	-0.0289816	-0.0160406	-0.00189818	-0.00945269
2009-06-17	0.00168807	-0.00239771	-0.00138258	-0.0187278	-0.0116417	0.00897946	-0.00312953	-0.017037	-0.0132763
2009-06-18	0.031866	0.024441	0.00837584	0.00778217	0.000560787	-0.0140328	-0.00280533	0.00653269	-0.00982767
2009-06-19	0.00291799	0.00937134	0.00310937	0.00040922	0.0150696	0.00847004	0.00921035	0.0105305	0.00750497
2009-06-22	-0.0115893	-0.0142406	-0.0310784	-0.0306459	-0.0260857	0.00408005	-0.0372606	-0.0284508	-0.011895
2009-06-23	-0.0141688	-0.0247622	0.00230407	0.00292536	-0.00094518	-0.0285591	0.00642442	-0.000397087	-0.0146766
2009-06-24	0.0240464	0.0323222	0.00650322	0.0270074	0.011751	0.00425394	-0.00285468	0.021006	0.0169915
2009-06-25	0.0157864	0.020041	0.0212176	-0.00735742	-0.00642245	0.021228	0.0364316	-0.00649188	0.013359
2009-06-26	0.0117196	0.0209449	-0.00147894	-0.0050308	-0.00273147	0.008266	-0.000563101	-0.00243455	0.00989602
2009-06-29	0.00231558	0.00453918	0.00902434	0.0224859	0.0124196	-0.00955408	0.0125841	0.016101	0.00300927
2009-06-30	0.00292966	0.00646216	-0.00856738	-0.0157734	-0.010488	0.0177262	-0.0129921	-0.00975631	-0.00693209
2009-07-01	0.0079968	0.00806686	0.00435243	0.0199305	0.0213049	-0.00186045	0.00153385	0.018997	0.0110497
2009-07-02	-0.00559071	-0.0029637	-0.0295776	-0.038856	-0.0248176	-0.00643722	-0.0101201	-0.0261489	-0.00483702
2009-07-03	-0.00651882	-0.0115083	0.00256248	-0.00218104	0.000472222	-0.00610192	-0.0017654	-0.000129804	0.000864074
2009-07-06	-0.00105307	-0.00972485	0	-0.0120493	-0.00982075	-0.0138691	-0.00616405	-0.0105267	-0.0139548
2009-07-07	0.0122655	0.0174047	-0.0198799	-0.0115958	-0.00188502	-0.0034229	-0.0232827	-0.00506289	-0.0023887
2009-07-08	-0.00151973	-0.0098359	-0.0016699	-0.00556984	-0.0112404	-0.0238142	-0.00565724	-0.011371	-0.00794518
2009-07-09	-0.00453904	-0.00123006	0.00354095	0.0124791	0.00445843	-0.0138621	0.000873993	0.00571355	0.00354608
2009-07-10	-0.00561734	-0.00892735	-0.00402995	-0.011679	-0.00760331	-0.000406925	0	-0.0109511	-0.00345689
2009-07-13	0.00607415	0.00394159	0.024628	0.0314114	0.0179852	-0.0258445	-0.000691001	0.0201038	-0.0134014
2009-07-14	-0.00823224	0.0019614	0.00530194	0.0124896	0.00843627	0.0230983	-0.00640426	0.00981059	0.0168322
2009-07-15	0.0325115	0.0360415	0.0291995	0.0302285	0.0253503	0.000802976	0.0484072	0.0270375	0.0274352
2009-07-16	0.00637044	0.0101055	0.00860464	0.00581654	0.00351389	0.00804908	0.0120333	0.00462188	0.00602219
2009-07-17	-0.0113236	-0.00928196	-0.000382751	0.00426951	0.00617103	0.00546014	0.00296182	0.00639321	0.0102823
2009-07-20	0.0137805	0.0247677	0.0113667	0.0103412	0.012409	0.0269555	0.0205848	0.010857	0.0230924
2009-07-21	-0.00635713	-0.00542025	0.0036207	0.0126077	0.00842601	0	0.00148512	0.00790874	0.00152613
2009-07-22	0.00475847	0.00943432	-0.000534409	0.00540159	0.00278555	0.00734345	-0.00302897	0.00275722	-0.00471012
2009-07-23	0.0184953	0.0277085	0.0230226	0.0242508	0.0146023	0.00715105	0.0219162	0.0181311	0.0163986
2009-07-24	0.0126037	0.0146996	0.00303751	-0.00342095	0.0036776	0.0153629	0.00382684	0.000477297	0.00371215
2009-07-27	0.0112359	0.0153752	0.00297741	0.00423437	0.00207362	0.0143874	0.00168798	0.0035899	0.0092794
2009-07-28	0.00403622	0.008396	-0.00260985	-0.0147342	-0.012573	-0.000138779	-0.00141257	-0.00971429	0.00349532
2009-07-29	0.0093307	-0.000453061	-0.00457344	0.018302	0.00412063	0.00257222	-0.0136223	0.00679058	-0.0131024
2009-07-30	0.0437448	0.0456373	0.0118254	0.016996	0.0183247	0.00512565	0.0137324	0.0202595	0.0100004
2009-07-31	0.0108261	0.0161939	0.000739529	-0.00533444	-0.00502166	0.0186751	0.00527261	-0.00240082	0.0107557
2009-08-03	0.0452196	0.0503394	0.0152256	0.0176062	0.0159514	-0.000421067	0.0222464	0.0134112	0.0161591
2009-08-04	0.00185354	0.00590121	0.00300755	-0.00181301	-0.00237334	0.00217489	0.000714056	-0.00255523	-0.00334863
2009-08-05	-0.0179939	-0.0164778	-0.00291779	-0.0118868	-0.00521544	-0.0118755	0.0061554	-0.00618667	-0.00486019
2009-08-06	-0.00144548	-0.00707552	-0.00564058	0.00316517	0.00929582	0.0131355	-0.0112183	0.0071419	0.00162417
2009-08-07	0.0210281	0.0122364	0.0133497	0.0164341	0.00872423	0.00230767	0.0102602	0.0110805	-0.00262147
2009-08-10	-0.00183247	0.00428984	-0.00335055	-0.0075094	-0.00198862	0.0107154	0.0088371	-0.00317724	0.00419627
2009-08-11	-0.0227848	-0.0365498	-0.0127409	-0.024723	-0.0108374	0.00579829	-0.0189897	-0.0134437	-0.00611657
2009-08-12	0.00481383	-0.00436774	0.0114592	0.0120875	0.0096932	-0.0143158	0.0147222	0.0105125	-0.00639776
2009-08-13	0.0134539	0.0333357	0.00685647	0.0094911	0.00817124	0.00784552	0.00809607	0.00787208	0.0132756
2009-08-14	-0.00408415	-0.00714228	-0.008568	-0.0171803	-0.00876504	0.00759102	-0.00721288	-0.00832487	-0.00142689
2009-08-17	-0.000271351	-0.0178959	-0.0245599	-0.020456	-0.0147454	-0.0315104	-0.0253912	-0.0192533	-0.0297724
2009-08-18	-0.00129998	0.00632868	0.0100945	0.00940083	0.00874529	0.00159096	0.00957049	0.00964188	0.00285303
2009-08-19	0.0314148	0.0278615	0.00683744	-0.00357923	0.000831956	-0.00790283	0.00727406	-4.21174e-05	-0.00335
2009-08-20	0.0197573	0.026608	0.0108893	0.0150016	0.0141645	0.0174295	0.0119484	0.0141989	0.0132966
2009-08-21	0.0131082	0.0146606	0.0184515	0.0281591	0.0196311	-0.0140835	0.0156777	0.0233488	0.00681287
2009-08-24	0.012677	0.0164679	-0.000545889	0.0103821	0.00929514	0.0329388	0.000796509	0.0105006	0.0160656
2009-08-25	0.00629142	-0.000329157	0.00236661	0.00674202	0.00419852	-0.00794087	-0.00614607	0.00495771	-0.0014647
2009-08-26	-0.0234356	-0.0268644	0.000116725	-0.00633991	-0.00534292	0.0134694	0.00599028	-0.00410648	-0.00199921
2009-08-27	0.00898742	0.00630721	0.00277791	-0.00939574	-0.00434427	-0.0157001	-0.00107387	-0.00415601	-0.00647366
2009-08-28	0.00370579	0.00739278	-0.00199038	0.00855873	0.00807916	0.00572828	-5.19908e-05	0.00924254	0.00502498
2009-08-31	-0.021433	-0.0251873	-0.00810914	-0.0108079	-0.0183382	-0.00395784	-0.0212286	-0.0061643	-0.0128325
2009-09-01	0.00822431	0.00715257	-0.0223722	-0.0242471	0	0.00357045	-0.0120033	-0.0179677	0.00359674
2009-09-02	-0.025344	-0.0316045	-0.00330191	-0.00139944	-0.000456564	-0.023989	-0.0077158	-0.00598433	-0.00832095
2009-09-03	0.00837808	0.0125073	0.00849859	-0.00346852	-0.00430609	-0.00642302	0.00577896	-0.0014659	0.00811716
2009-09-04	-0.0215879	-0.0179841	0.0130322	0.0155367	0.0113801	-0.00269879	0.0168215	0.0127728	0.00970204
2009-09-07	0.00250944	0.0107775	0.00880606	0.01458	0.0166587	0.0130516	0	0.0155833	0.0100258
2009-09-08	-0.00949741	-0.0066586	0	0.0033293	0.00285411	0.00697979	0.0210126	0.00287353	0.0139288
2009-09-09	-0.00583445	-0.0086716	0.00775228	0.0167388	0.0114556	-0.00783279	0.000950201	0.0108474	-0.00274605
2009-09-10	0.00757423	-0.00256754	0.0103683	0.00367266	-0.00332266	0.0193545	0.0107519	-0.00103475	0.00923367
2009-09-11	0.0362716	0.0407608	-0.00135131	0.00521448	0.00476039	-0.00661707	-0.00290842	0.00517993	0.00360625
2009-09-14	-0.00199497	-0.00521374	0.00631912	-0.000672343	0.00147551	-0.0234696	0.00856412	-0.000698728	-0.0084052
2009-09-15	-0.0125367	-0.00413628	0.0031304	0.00155389	0.00461188	0.00152402	0.00670439	0.00429702	0.00832317
2009-09-16	0.0166152	0.0252847	0.0152073	0.0125835	0.0161322	0.00518832	0.0191692	0.0145125	0.0158133
2009-09-17	0.00608462	0.0115432	-0.00306431	0.00540268	0.00775657	0.0167065	-0.00290103	0.00544515	0.00576158
2009-09-18	0.00415738	0.000267365	0.00263381	-0.00477658	0.00172199	-0.00703941	0.00772294	-0.00036404	0.000412402
2009-09-23	0.00819512	0.00485892	-0.00697927	-0.00031212	-0.00649712	0.0166087	-0.00341587	-0.00220078	-0.0040045
2009-09-24	0.00902365	0.00848233	-0.00955658	-0.0171292	-0.0117629	0	-0.00746631	-0.0141793	-0.010153
2009-09-25	-0.00743351	-0.0121069	-0.00610934	-0.00425509	0.000570782	-0.0267423	0.00514943	-0.00203401	-0.00059241
2009-09-28	0.00400164	0.000624585	0.0176529	0.0273747	0.0162964	-0.0252989	0.0157968	0.0176151	-0.00319167
2009-09-29	0.011414	0.0140484	-0.00223207	-0.00398085	-0.00116218	0.00901859	-0.00133821	-0.00124504	0.00896192
2009-09-30	-0.00944238	-0.00606464	-0.00333382	-0.00673654	-0.00501283	0.0032649	0.00461089	-0.00405182	-0.000743823
2009-10-01	-0.00221304	-0.00640531	-0.0260972	-0.0214813	-0.0169131	-0.0153733	-0.0173644	-0.017377	-0.00323305
2009-10-02	-0.0200183	-0.0268055	-0.00451569	-0.0157228	-0.0117772	-0.0250407	0.0117241	-0.0162125	-0.0087413
2009-10-05	0.0230265	0.0321779	0.0147655	0.00746126	0.00711079	-0.00591354	0.0193788	0.0080329	0.00199194
2009-10-06	0.0311609	0.0445743	0.0136124	0.026651	0.0223778	0.00178764	0.00483046	0.0235231	0.0130762
2009-10-07	-0.00873022	-0.00968735	0.00270795	-0.00298981	-0.00567978	0.0110614	-0.000526698	-0.00404326	0.00429598
2009-10-08	0.017061	0.0227598	0.00744212	0.0133467	0.0089054	0.00334861	0.0177539	0.0108928	0.00769598
2009-10-09	0.00674626	0.00406403	0.0056248	-0.000815511	0.00141521	0.0185326	0.00486581	9.15971e-05	0.00617626
2009-10-12	0.0155205	0.0153818	0.00437682	0.0124141	0.00931351	0.00598918	0.00893439	0.0105751	0.00434366
2009-10-13	-0.0184311	-0.0140921	-0.0027915	-0.0119888	-0.0108257	0	0	-0.0103159	4.48057e-05
2009-10-14	0.0188839	0.026778	0.0173937	0.0241755	0.0195968	-0.00162389	0.0237693	0.0198696	0.0164266
2009-10-15	-0.000160911	0.00192631	0.00414882	-0.00400004	-0.00631736	0.0175817	0.00755436	-0.00411803	0.00177671
2009-10-16	-0.0243469	-0.0347436	-0.00813102	-0.0150994	-0.00629972	0.00184522	-0.00756947	-0.00916747	-0.00619924
2009-10-19	0.00991538	0.0106069	0.00936138	0.0188295	0.0174379	-0.00205425	0.015573	0.0159489	0.0108307
2009-10-20	0.0150782	0.0184633	-0.00625867	-0.006994	-0.00724	0.00975347	-0.0292155	-0.00585889	-0.00324816
2009-10-21	0.0047744	-0.0030195	-0.0088932	0.00373028	0.00276157	-0.000333813	0.0027984	0.00161248	-0.00249717
2009-10-22	-0.00544121	-0.00928097	0.0105874	-0.0121694	-0.00965102	-0.00642897	0.00986173	-0.010527	-0.00501161
2009-10-23	0.00710587	0.0108795	-0.0122533	-0.00394326	0.00673687	0.00153965	-0.0164036	-0.000778076	0.00392
2009-10-26	-0.00293459	-0.0101217	-0.0117865	-0.0172358	-0.00975636	0.00771403	0.000414922	-0.0139863	0.000255686
2009-10-27	-0.0163246	-0.0263676	-0.00332338	-0.00126627	0.00178972	-0.0145966	-0.0300224	0.000550359	-0.0148596
2009-10-28	-0.030083	-0.0300804	-0.0197344	-0.024931	-0.0234609	-0.0135465	-0.0486461	-0.0216144	-0.0259506
2009-10-30	-0.0358496	-0.0360513	-0.00619584	-0.0149042	-0.00709146	-0.004009	0.0227439	-0.00509847	-0.006025
2009-11-02	0.00573538	-0.0013283	0.00643559	0.00292464	0.011824	-0.0233697	0.0176671	0.00641606	-0.00153576
2009-11-03	-0.0239066	-0.0301179	0.00242304	-0.0143676	-0.0132721	0.00421026	0	-0.0141071	-0.00735304
2009-11-04	0.0202191	0.0280409	0.00104211	0.0168338	0.013938	0	0.0200708	0.016556	0.0185583
2009-11-05	0.000351028	0.00452163	0.0190529	0.00671664	0.00345923	-0.0129714	0.0140297	0.00645004	0.00236358
2009-11-06	-0.0069621	-0.00101383	0.00250008	0.00133647	0.00333064	0.00737285	-0.00541453	0.00138054	0.00412993
2009-11-09	0.0169857	0.0222233	0.0219952	0.0236724	0.0178268	0.00200425	0.026754	0.0190479	0.01784
2009-11-10	0.00751899	0.00765377	-6.40413e-05	-0.00116087	-0.000898172	0.0062745	0.00134322	-0.00235552	0.00441103
2009-11-11	0.0150295	0.0176891	0.00501936	0.0097771	0.00691609	9.62395e-05	0.00192867	0.00648076	0.00797858
2009-11-12	-0.00241717	-0.00691794	-0.0103123	-0.000774776	0.00184003	-0.00682961	-0.0303051	-0.000105516	-0.0106818
2009-11-13	-0.00625862	-0.00904456	0.0057229	0.00402968	0.00376435	-0.00349225	0.0135314	0.00193028	0.00291667
2009-11-16	0.00685869	0.0101215	0.0143639	0.0205356	0.0161628	0.00213379	0.0197198	0.0141232	0.0156929
2009-11-17	-0.0319145	-0.0349071	0.000919076	-0.00455659	-0.0068602	-0.00627528	0.0116241	-0.00656891	0.000917437
2009-11-18	-0.0175818	-0.0164249	-0.000468443	0.00158741	-0.000711078	-0.00547543	-0.0132915	0.000538703	-0.00178435
2009-11-19	-0.00659821	-0.0137732	-0.0135168	-0.0148709	-0.014025	-0.0132456	-0.00284547	-0.0156216	-0.00544791
2009-11-20	-0.0193478	-0.0224474	-0.00322008	-0.00686828	-0.00309913	-0.0054381	0.00724075	-0.00585246	-0.00311679
2009-11-23	0.0125335	0.0139444	0.0135239	0.0241328	0.0196294	-0.0101698	0	0.0204487	0.00798496
2009-11-24	-0.00630611	-0.0100039	-0.00053348	-0.00556057	-0.00589917	0	0.007575	-0.00640233	-0.00436639
2009-11-25	0.00055265	0.00634314	0.00449402	0.00582598	0.0076342	0.00425193	0.00887357	0.00538219	0.00421163
2009-12-01	0.0119031	-0.000838954	-0.00159496	-0.00456147	-0.00985303	0.0137334	0.00921868	-0.00831802	-0.00441564
2009-12-02	0.038613	0.0457644	0.000342636	0.000877292	0.00285725	0.00383085	0.00100612	0.0028696	0.00598553
2009-12-03	0.0364684	0.0429373	-0.00843765	-0.00196156	-0.00270667	0.0376557	-0.00438181	-7.25925e-05	0.00302367
2009-12-04	0.00851445	0.0115563	0.00549437	0.00816366	0.00176768	0.00449195	-0.0104622	0.00776468	-7.45967e-05
2009-12-07	-0.00372374	-0.0114181	-0.00247145	-0.00567126	-0.00220068	0.0143646	0.0133418	-0.0033579	0.000403137
2009-12-08	-0.00651996	-0.00866933	-0.0103044	-0.0167645	-0.0166326	-0.00267185	-0.0114945	-0.0152145	-0.00600692
2009-12-09	-0.00822914	-0.0114474	0.00366564	-0.00718749	-0.00368275	-0.0134774	0.00416971	-0.00846942	-0.00447854
2009-12-10	0.00829226	0.0102382	0.0058227	0.0107742	0.0077525	-0.0142848	0.0104725	0.00898664	0.00319135
2009-12-11	-0.00420445	-4.13653e-05	0.00367628	0.00824579	0.00327432	0.0245422	0.00781192	0.00309408	0.00552435
2009-12-14	0.0163075	0.0106671	0.00693534	0.00795433	0.0101543	-0.000216686	0.00118312	0.00803001	0.00432518
2009-12-15	0.00499028	-8.18578e-05	-0.00556247	0.00156368	-0.00556548	-0.0021992	-0.000548103	-0.00142723	-0.00322693
2009-12-16	0.00726263	0.00852825	0.00112759	0.0157224	0.00650571	0.00927212	-0.00999044	0.0102942	-0.00174416
2009-12-17	-0.0169489	-0.0227292	-0.0118808	-0.0100428	-0.0194922	-0.00133817	-0.0229062	-0.0133551	-0.00960511
2009-12-18	0.00350124	0.00270525	0.00581294	-0.00226626	-0.00399447	-0.00214224	-0.00409377	-0.00555832	-0.00367922
2009-12-21	0.0225302	0.0193541	0.0104489	0.0168891	0.0185311	0.00407567	-0.0130955	0.0150163	-0.00377093
2009-12-22	0.0048947	0.00344592	0.00355724	0.002553	0.0065332	0.0189253	0.0223943	0.00748803	0.00923702
2009-12-23	-0.00721131	-0.00754069	0.00229607	0.00197427	0.00816743	0.0151942	0.0025332	0.00413472	0.00780351
2009-12-24	0.00581665	0.0134873	0.00524239	0.00760516	0.00556856	0	0.00462024	0.00182467	0.00478062
2009-12-25	0.00389112	0.00509127	0.00115337	0	0.00649449	-0.00401396	0	0	0.000340369
2009-12-28	-0.000811768	-0.0016775	0	0	0	0.0132067	0	0.00368106	0.00414208
2009-12-29	0.00322285	0.00581664	-0.00140197	0.0014366	0	0.000360093	0.00578571	0.00418611	-0.000190542
2009-12-30	-0.00227405	-0.00433429	0.000195328	-0.00904344	-0.0073278	-0.00864977	0.00426639	-0.00746846	0.000340849
2009-12-31	0.0221384	0.0343722	-0.0101004	0.0151381	0.00277501	0.0102212	0.0210203	0.000783591	0.00685449
2010-01-04	0.0102294	0.0144776	0.0159161	0	0.0160176	0	0	0.0167778	0.00839901
2010-01-05	0.013898	0.0240189	0.00311081	-0.00272182	0.00402802	0.00253461	0.00278006	0.00131582	0.00806674
2010-01-06	0.00795698	0.00570635	0.000545376	0.000409408	0.00135716	0.00463451	0.00693772	0.000585708	0.00532962
2010-01-07	0.00777175	0.00749847	0.00399328	-0.00248389	-0.000596923	-0.00465043	-0.00393824	-0.000359589	-0.00637465
2010-01-08	-0.00318919	0.000835311	0.00287755	0.0030273	0.00135613	0.0108623	-0.00267209	0.00355442	0.00122925
2010-01-11	-0.0161307	-0.00603264	0.00174523	0.000478552	0.000704461	0.00745663	0.00241656	-0.000497677	0.00544737
2010-01-12	-0.00454863	-0.0043387	-0.00942544	-0.0162727	-0.00713978	0	-0.00508154	-0.00989341	-0.0037292
2010-01-13	0.0175592	0.0213625	0.00829138	0.00338313	-0.00459343	-0.013335	0.0043998	-7.47122e-05	-0.00726345
2010-01-14	0.00207392	-0.00207582	0.00242357	0.00430723	0.0045025	0.0159549	-0.00833184	0.0054997	0.00231268
2010-01-15	-0.013517	-0.0155158	-0.0108822	-0.0190333	-0.00781482	0.00679955	-0.0118607	-0.0111147	-0.00205645
2010-01-18	0.0100443	0.0134949	0.0124222	0.00722033	0.00712345	-0.0116335	0.00611366	0.00540311	0.0017254
2010-01-19	0.0110979	0.00778348	0	0.00974028	0.00339769	-0.00834233	0.00729312	0.00529624	0.00211863
2010-01-20	0.00559711	0.00229396	-0.0106544	-0.0211286	-0.0168837	-0.00254669	-0.0247498	-0.0175931	-0.00905076
2010-01-21	-0.00303367	-0.0130114	-0.0191266	-0.0180304	-0.0159358	0.0121163	-0.0287073	-0.0137765	-0.0148555
2010-01-22	-0.0238567	-0.0274527	-0.0223898	-0.00902797	-0.00603493	-0.0258983	-0.000754774	-0.00819944	-0.0123846
2010-01-25	0.00523669	0.00395155	0.00458754	-0.011292	-0.00808464	-0.007379	-0.010566	-0.00766744	-0.00414363
2010-01-26	0.000671833	-0.0084895	-0.00421207	0.00664764	0.00315074	-0.0179878	0	0.00388171	-0.0174377
2010-01-27	-0.00454772	0.000287764	0.00486832	-0.00454911	-0.0113204	-0.00711465	-0.00695287	-0.0101275	-0.00727536
2010-01-28	0.0128524	0.0129203	-0.0118882	-0.0183972	-0.0138569	0.0156983	0.00792914	-0.0122744	0.0105773
2010-01-29	-0.00219099	-0.000908373	-0.00987777	0.0122809	0.00828322	-0.0209834	-0.00283991	0.0100725	-0.00631476
2010-02-01	0.0158917	0.0158222	0.0141654	0.00811314	0.0112881	0.000684211	0.0177312	0.00852005	0.00181692
2010-02-02	-0.00683761	-0.00318405	0.0128895	0.00971133	0.00681819	0.0161424	0.00883843	0.00922684	0.001154
2010-02-03	-0.00143246	0.000667055	-0.00548943	-0.00660182	-0.00573252	0.00319994	-0.000804338	-0.00594101	0.0115408
2010-02-04	-0.0295752	-0.0401044	-0.0316358	-0.0247841	-0.0219015	-0.00465794	-0.0484669	-0.0275187	-0.0197741
2010-02-05	-0.0383008	-0.0538266	0.00289297	-0.0180355	-0.0153726	-0.0292863	-0.0184856	-0.021005	-0.02729
2010-02-08	-0.0300158	-0.0310034	-0.00890285	0.00925167	0.00618526	-0.0105224	0.00619463	0.00699016	-0.00380953
2010-02-09	0.0177254	0.02415	0.0129558	0.00244193	0.003822	-0.00190297	0.024479	0.00281265	0.0129605
2010-02-10	-0.00510604	-0.00277599	0.00739886	0.00690737	0.00394385	0.0159094	0.021568	0.00597375	0.003337
2010-02-11	0.0159602	0.0137633	0	-0.00587667	0.00573179	0	0	0.000520113	0.0111113
2010-02-12	-0.00619301	-0.00924414	-0.0027484	-0.000643384	-0.00368789	0	-0.00415202	-0.00347317	-0.00235416
2010-02-15	0.00528526	0.00621093	0.0178407	0.00194524	0.00484967	-0.00784765	0.021482	0.00293229	0.00229629
2010-02-16	0.00803396	0.0111552	0	0.0145942	0.0147146	0.00209003	0	0.0126187	0.00594734
2010-02-17	0.0290398	0.0325061	0.00422899	0.0100032	0.00617832	0.0268025	0	0.0104604	0.0103103
2010-02-18	-0.0155789	-0.0244842	0.00656317	0.00566172	0.00914954	0.00279617	0.0081557	0.00705834	-0.00232616
2010-02-19	0.0164358	0.012867	0.00218419	0.00730372	0.00619661	-0.0207356	-0.00352942	0.00674318	-0.00823525
2010-02-22	-0.0137114	-0.0078254	-0.00104637	-0.00589109	-0.00113909	0.0269836	-0.00612848	-0.00270824	0.00801882
2010-02-23	-0.0226205	-0.0329819	-0.0121766	-0.0149429	-0.00693718	-0.0046616	-0.0161454	-0.0114541	-0.00182614
2010-02-24	-0.0347694	-0.0435269	0.00967351	0.00203929	0.00521675	-0.0149164	-0.00474592	0.00312224	-0.00639463
2010-02-25	-0.0187026	-0.0202653	-0.00208316	-0.0149233	-0.0121834	-0.00954354	0.00494255	-0.0140501	-0.00692766
2010-02-26	0.019627	0.022167	0.00140435	0.0118825	0.0143522	0.00237987	0.00576066	0.0138246	0.00774579
2010-03-01	0.0293063	0.0298271	0.0101073	0.020342	0.00955362	0.00453541	0.0108428	0.0136415	0.011575
2010-03-02	0.00569611	0.00817721	0.00232764	0.0109748	0.014362	0.00488186	0.00816258	0.0102623	0.00828374
2010-03-03	0.00432159	0.00379904	0.000429127	0.00712758	0.00891331	0.00305739	-0.0020381	0.00800666	0.003712
2010-03-04	-0.00500952	-0.00872609	0.00372922	-0.00388524	-0.00108495	-0.0105321	0.0025691	-0.000617057	-0.00406747
2010-03-05	0.0227734	0.0225755	0.0139103	0.014057	0.0130495	0.0217648	0.0151032	0.0147545	0.0106452
2010-03-08	0.0126681	0.0224109	-0.000175654	-0.00024674	0.00123143	0.0207081	-0.00395861	0.00106467	0.00975627
2010-03-09	-0.00633526	-0.0122974	0.00171131	0.00169702	-0.000785083	-0.00172737	0.0144916	-0.000303826	0.00128843
2010-03-10	-0.00391551	-0.00293613	0.00451432	0.00859883	0.00681322	-0.000353026	0.00577552	0.00795502	0.00285218
2010-03-11	-0.00716167	-0.00558747	0.00403337	-0.00136363	-0.00413932	0.00951824	-0.00134416	-0.00385676	-0.00228513
2010-03-12	-0.00274468	0.003557	-0.00021737	0.00277588	0.00147649	0.00806029	-0.00781467	0.00160195	2.81704e-05
2010-03-15	-0.0050213	-0.00633736	0.000452076	-0.00701347	-0.00565089	6.69667e-05	-0.00458209	-0.00670278	-0.00754002
2010-03-16	0.0239904	0.0247787	0.00774906	0.0113572	0.00472612	-0.00281927	0.0132121	0.00842248	0.00667894
2010-03-17	0.0199082	0.0270467	0.00580479	0.00888523	0.0042965	0.011616	-0.00313608	0.00599446	0.0117534
2010-03-18	-0.0142674	-0.0185036	-0.000325895	-0.00198894	-0.000354384	-0.00953645	-0.000372974	-0.00299057	-0.000118508
2010-03-19	-0.00182161	-0.00774918	-0.00509948	-0.00498219	0.00132829	0.00748216	-0.0125321	-0.00162835	-0.00174715
2010-03-22	0.00848664	-0.000333173	0.00508233	0.000847123	-0.000991624	-0.00468266	0.00308985	-0.00158653	-0.00595858
2010-03-23	0.00848661	0.00919975	0.00714539	0.00495971	0.00514222	0	0.00498452	0.00613526	0.00204915
2010-03-24	0.0143379	0.015643	-0.00550839	0.00360477	0.000757609	0.00378709	-0.00685469	-0.000184603	-0.000280023
2010-03-25	0.0340207	0.0342818	-0.00170563	0.0154374	0.00871515	0.00127704	-0.00685817	0.00999393	-3.32141e-05
2010-03-26	-0.00763716	-0.0025391	0.000737463	-0.00210561	-0.00430424	0.0153513	0.00351505	-0.00336528	0.00423358
2010-03-29	0.0010159	0.00298705	0.00566714	0.00599502	0.00134926	-0.000900703	0.0181217	0.00163979	0.006657
2010-03-30	0.00152016	0.0028999	4.26168e-05	-0.0023416	-0.00674693	0.0100229	0.000300217	-0.003988	0.00332249
2010-03-31	-0.00381384	9.20726e-06	-0.00327827	0.00180547	0.00128613	-0.000649026	0.00587181	-0.000537831	-0.0015374
2010-04-01	0.0204799	0.0232565	0.00738652	0.0132392	0.0114317	0.0138318	0.0107981	0.0119162	0.0134516
2010-04-02	0.0060751	0.0066704	0.00789676	0	0.00616038	0.00370077	0.00216253	0	0.00122919
2010-04-05	0.0100274	0.0115539	0	0	0	0.00470357	0	0	0.00445222
2010-04-06	-0.00407719	-0.0013568	0.00168288	0.00266661	0	-0.00503767	-0.00272499	0.00525017	0.00294918
2010-04-07	0.00408793	0.0113018	-0.00589405	-0.00477771	-0.00317089	0.000931112	-0.00427095	-0.00395315	0.00312478
2010-04-08	-0.00399052	-0.00680099	0.00336867	-0.0081619	-0.00861023	-0.0110976	0.0139154	-0.00935721	-0.00362746
2010-04-09	0.013151	0.0230877	0.00666162	0.0125381	0.0101536	0.00323075	-0.0051396	0.0134903	0.00394242
2010-04-12	-0.00616339	-0.00359449	0.00176506	0.000158395	0.001143	0.0042358	-0.0113075	0.00230319	-0.00517916
2010-04-13	-0.0127678	-0.0162142	0.000685109	-0.00318231	-0.0027558	-0.00809084	0.00251758	-0.00333741	-0.00379937
2010-04-14	0.0213788	0.0281459	0.0110884	0.00760562	0.00598721	0.00390502	0.00342671	0.0061868	0.00750733
2010-04-15	-0.00465007	-0.0032906	0.000842168	0.0020764	0.00493922	0.00612938	-0.00721964	0.00359452	5.08239e-06
2010-04-16	-0.0141812	-0.011798	-0.016258	-0.0177277	-0.0140032	-0.0153391	-0.0157637	-0.0151129	-0.0125911
2010-04-19	-0.00121158	-0.014212	0.00451113	-0.00299109	-0.00280686	-0.0175744	-0.00466363	-0.00522531	-0.0155193
2010-04-20	0.0125269	0.0167081	0.00802603	0.0163829	0.00969464	-0.00074188	0.00317883	0.0120645	0.008943
2010-04-21	-0.00741867	-0.00376596	-0.00101943	-0.00541835	-0.0104806	0.0172231	0.000980505	-0.00889712	0.0025157
2010-04-22	-0.00192638	-0.00118032	0.00226124	-0.00994596	-0.0102032	-0.012792	0	-0.0129001	-0.00317965
2010-04-26	0.0120088	0.015476	0.00279256	0.0261406	0.015518	0.0195983	-0.00743541	0.0159722	0.00876836
2010-04-27	-0.0140844	-0.0176189	-0.0236596	-0.0276347	-0.0264865	0.00418886	-0.0348824	-0.0290215	-0.0118891
2010-04-28	-0.00489556	-0.0205787	0.00644194	-0.012279	-0.00302053	-0.026009	0.00217772	-0.0118229	-0.00972294
2010-04-29	0.013199	0.025293	0.0128601	0.00990584	0.00556926	0.0120654	0.0196391	0.0123603	0.00297106
2010-04-30	0.00435622	0.00875744	-0.0167877	-0.00149993	-0.0115478	0	-0.00661218	-0.00606873	0.0041647
2010-05-03	-0.0095245	-0.0178413	0.0130352	0.00507535	-0.0259399	-0.033259	-0.00610478	0.000863421	-0.00758687
2010-05-04	-0.0183031	-0.0215937	-0.0241272	-0.0262974	0	0	-0.0340973	-0.0307224	-0.0125064
2010-05-05	-0.0158185	-0.0280919	-0.00660836	-0.00809177	-0.012871	0	0.000693465	-0.0136544	-0.0133842
2010-05-06	-0.0120772	-0.0249217	-0.0328885	-0.00845901	-0.0152603	0	-0.0233787	-0.0177065	-0.0135541
2010-05-07	-0.0567526	-0.0769674	-0.0154266	-0.0332413	-0.0265809	-0.0314457	-0.00859965	-0.033875	-0.014725
2010-05-10	0.0689517	0.100621	0.0430347	0.05163	0.0503227	0.0158996	0.0402473	0.0670425	0.0253176
2010-05-11	0.000243026	-0.0106196	-0.00340313	0.00328478	-0.00992397	-0.0114223	-0.0158306	-0.00726498	-0.00656638
2010-05-12	0.0264742	0.0309994	0.013646	0.023858	0.0091998	-0.00164094	0.0123257	0.0129054	0.00716741
2010-05-13	-0.000807723	0.00619011	-0.0122194	0.0110138	0.00928158	0.0215592	-0.0067071	0.003241	0.00577998
2010-05-14	-0.03839	-0.0464396	-0.0189791	-0.0317299	-0.0319381	-0.0149924	-0.0214673	-0.0354583	-0.0110495
2010-05-17	0.00578097	-0.00343979	0.00110885	0.00168431	-7.60066e-05	-0.0219109	-0.00864764	-0.00055238	-0.0137535
2010-05-18	0.0160493	0.0212057	-0.0142977	0.0145648	0.00847703	0.000671928	-0.0327416	0.01374	-0.00241906
2010-05-20	-0.045389	-0.0735257	-0.0448992	-0.0479224	-0.0451312	-0.0209479	-0.044516	-0.0464206	-0.0363747
2010-05-21	-0.00623207	-0.00807281	0.0149127	-0.00660506	-0.00201263	-0.0248079	0.0349041	-0.000833535	0.00112439
2010-05-24	0.00821871	0.0151653	-0.0129921	-0.0040516	0.00132248	-0.00267514	-0.00572505	-0.00193892	0.00511012
2010-05-25	-0.0430921	-0.0573189	0.00035387	-0.0236406	-0.0257549	-0.0310677	-0.0122757	-0.0264484	-0.0275903
2010-05-26	0.0347237	0.0437824	-0.00567701	0.0153975	0.019522	0.00661347	0.016855	0.0193456	0.021562
2010-05-27	0.00726421	0.0149933	0.0323472	0.0306339	0.0307061	0.0122178	0.0311109	0.0298569	0.0171842
2010-05-28	0.0134098	0.0193889	-0.0124519	0.00152146	-0.00130976	0.0127056	-0.00233797	-0.000867179	0.00717598
2010-05-31	-0.0154856	-0.0251792	-0.0173143	0.00304773	-0.00484945	0.000585715	0.0176013	-0.000316987	0.0113251
2010-06-01	0.00138582	-0.0071334	0	0.00283619	0	-0.00583867	-0.0193139	-0.00243516	-0.0158822
2010-06-02	0.0137163	0.0179666	0.0255144	-1.17033e-05	-0.0023268	-0.0112442	0.017663	0.000555776	0.0034443
2010-06-03	0.00352035	0.00817716	0.00404324	0.0122021	0.011561	0.0318665	-0.0203347	0.0123107	0.0114554
2010-06-04	-0.0144391	-0.0216354	-0.0350175	-0.0193027	-0.0164845	-0.00131211	0	-0.0216911	-0.00623349
2010-06-07	-0.00562435	-0.0159773	-0.0136244	-0.00572958	-0.0111623	-0.0391761	-0.0080255	-0.00947019	-0.0159684
2010-06-08	-0.0118972	-0.0145326	0.0109162	-0.0061834	-0.00812111	0.00179865	0.0109397	-0.00812487	0.000723629
2010-06-09	0.0118657	0.0150062	-0.00595934	0.019607	0.0114298	-0.0104137	-0.00611345	0.0159015	0.0017334
2010-06-10	0.010203	0.0126529	0.0290798	0.0119324	0.00912087	0.0109074	0.0252165	0.0151739	0.0100205
2010-06-11	0.00490576	0.0151633	0.00437011	-0.0014474	0.00606051	0.0168958	0.00877988	0.00707027	0.00877387
2010-06-14	0.0100556	0.0174625	-0.00180632	0.0126792	0.00740901	0.0178304	-0.00113263	0.0118635	0.0078779
2010-06-15	0.0130679	0.00756769	0.0232225	0.00813822	0.00301347	0.000813447	0.0142061	0.00659392	0.00718841
2010-06-16	-0.000326348	0.00587831	-0.000556094	0.00256511	0.0038448	0.0179669	0.00478355	0.000989027	0.00333261
2010-06-17	0.00861658	0.0107992	0.00128214	0.00525679	0.00305	-0.00675256	-0.00324846	0.00246509	0.00260637
2010-06-18	0.00251849	0.00683658	0.00131629	-0.00105462	-0.000590212	-0.000438122	-0.00159716	0.00221193	0.00213478
2010-06-21	0.00424647	0.00819359	-0.00386425	0.0121489	0.00915655	0.0240203	0.00604951	0.00995611	0.0173269
2010-06-22	-0.00472805	-0.0112549	-0.0162013	-0.0038099	-0.00988051	-0.0122964	-0.000277692	-0.00796096	-0.00691279
2010-06-23	-0.0194957	-0.0221311	-0.00298992	-0.0103452	-0.013141	-0.018885	0.00537044	-0.0131762	-0.00206835
2010-06-24	0.000166157	-0.00802418	-0.0169462	-0.0144548	-0.0152357	0.000467458	-0.0189476	-0.0178007	-0.00671671
2010-06-25	-0.000920201	-0.00359084	0.00285522	-0.00736582	-0.0105848	-0.0194109	0.0137777	-0.00795352	-0.00231073
2010-06-28	0.0101318	0.0169511	-0.00203595	0.0141679	0.00498113	-0.00448141	-0.00928336	0.00912492	0.00053971
2010-06-29	-0.0218158	-0.0284431	-0.0315083	-0.033893	-0.0315471	-0.0127977	-0.0356131	-0.034903	-0.0210329
2010-06-30	-0.00683044	-0.00619495	-0.0101644	0.00226389	0.000549277	-0.019842	-0.0169554	0.00220193	-0.00696218
2010-07-01	-0.00558051	-0.00767762	-0.00324575	-0.0182853	-0.0228547	-0.0205711	0.00491112	-0.0224017	-0.00681967
2010-07-02	0.0200091	0.0260566	-0.00467329	-0.00398236	0.00669856	0.00131664	0.00316306	0.00356058	0.000513917
2010-07-05	0.00141982	0.00737523	0.00534469	-0.00308145	-0.00302228	0.0068293	-0.00924002	-0.00373859	-0.000926974
2010-07-06	0.0190622	0.0229226	0	0.021227	0.0289135	0.00766042	0.0195239	0.0263629	0.0155869
2010-07-07	0.000190164	-0.000713719	0.0308501	0.00869466	0.00998024	-0.00627255	0.0194503	0.0129382	0.000986979
2010-07-08	0.00958515	0.0153356	0.00936867	0.00711645	0.0179248	0.027223	0.00302935	0.0122328	0.0075051
2010-07-09	-0.00340081	-0.00236654	0.0071781	0.0048889	0.00535241	0.00518592	-0.00816228	0.00590626	0.00860591
2010-07-12	0.00730368	0.00245442	0.000732597	0.00196831	0.00662145	-0.00388953	0	0.0039204	0.00222803
2010-07-13	0.0122373	0.0125572	0.0152619	0.0185752	0.0199278	-0.00114014	0.0114652	0.0188085	0.00391051
2010-07-14	0.000388746	0.00966384	-0.000155215	0.00300462	-0.00332558	0.0266935	-0.00325562	-7.34394e-05	0.00361627
2010-07-15	-0.0105423	-0.007802	0.00119545	-0.00977424	-0.00806518	-0.0112635	0.00015752	-0.0092171	-0.00487016
2010-07-16	0.000683248	0.00474386	-0.0292429	-0.0178993	-0.010106	-0.0290344	-0.0182794	-0.0156749	-0.00647278
2010-07-19	0.00664811	0.00160952	0.00596407	-0.00517206	-0.00205682	-0.0115348	0.0152507	-0.00339961	0.000105052
2010-07-20	0.00194908	0.00488972	0.0113519	-0.00695025	-0.00171076	0	0.0182535	-0.00320276	0.00719669
2010-07-21	0.0215237	0.0270405	-0.0129027	0.00382845	0.0145066	-0.0023284	0.000217155	0.00944534	0.00888012
2010-07-22	0.00711493	0.00875917	0.0222636	0.02502	0.0188448	-0.00626498	0.0195207	0.0215109	0.00618863
2010-07-23	-0.0104003	-0.00650197	0.00818643	0.00393063	-0.000225853	0.0225274	0.00870749	0.00094104	0.00733641
2010-07-26	0.003504	0.00297695	0.0111379	0.00450952	0.00722079	0.00767909	0.00180769	0.00650243	0.00230446
2010-07-27	0.0137065	0.018681	-0.00104987	0.00211264	0.0027247	-0.000716823	0.00347064	0.00550249	0.00200697
2010-07-28	0.00124887	0.00258002	-0.00694607	-0.00458089	-0.00860993	0.0266424	0.00200776	-0.00455476	0.000772417
2010-07-29	0.00549689	0.00542919	-0.00416731	-0.00718556	-0.00107206	-0.00588712	0.00218298	-0.00320767	0.00143227
2010-07-30	-0.0144364	-0.0153017	6.3546e-05	0.00216077	-0.0105941	-0.0165051	0.00834398	-0.00616591	-0.00329498
2010-08-02	0.0137111	0.0221251	0.0217835	0.0231777	0.026111	0.00345517	0.0147321	0.0251948	0.0157492
2010-08-03	-0.0101803	-0.00641548	-0.00480787	0.00250476	-0.000111177	0.0128426	-0.0076183	0.000501044	-0.00249826
2010-08-04	-0.00329812	-0.00806588	0.00603285	0.00370592	-0.00191047	-0.0213391	0.00403614	0.000769452	0.00157399
2010-08-05	-0.00464566	-0.00591898	-0.00126939	0.000355312	-0.00379465	0.017195	0.00204852	-0.00196108	-0.000640049
2010-08-06	0.00251148	0.00573053	-0.00371088	-0.0117446	-0.00624406	-0.00122305	-0.00464446	-0.0101997	-0.00184614
2010-08-09	0.00221718	0.00820761	0.00546807	0.0145857	0.0145401	-0.00724764	-0.00342756	0.0133679	0.00361153
2010-08-10	-0.0120288	-0.0178878	-0.0059853	-0.010342	-0.0063225	-0.00224226	-0.00946078	-0.0077525	-0.0099664
2010-08-11	-0.0173021	-0.0256587	-0.0285833	-0.0212511	-0.0247056	-0.0274058	-0.0215476	-0.0249102	-0.0141131
2010-08-12	0.0039309	-0.00383249	-0.00539328	-0.00307586	0.00397668	-0.00867426	0.00267161	0.000432349	-0.00531888
2010-08-13	0.00164551	0.00694723	-0.0040317	-0.00404391	0.00176446	0.00442651	0.00450731	-0.000208761	0.00472527
2010-08-16	0.00584745	0.00657854	0.000120447	2.61845e-05	0.000132683	-0.00615607	0.00658817	-0.000690329	0.00326644
2010-08-17	0.0108231	0.0202381	0.0121185	0.015561	0.0140028	-0.00381189	0.0131363	0.0142319	0.00480585
2010-08-18	-0.000327821	-0.000327362	0.00148168	-0.00324223	-0.00893617	0.00857076	0.000798687	-0.00443828	0.000130577
2010-08-19	-0.0100436	-0.0121186	-0.0170804	-0.0181354	-0.0174245	0.0131312	-0.0111653	-0.0165594	0.00113875
2010-08-20	-0.00169151	-0.00996114	-0.0036697	-0.0115843	-0.00307497	-0.0197719	-0.00314456	-0.00987618	-0.00249624
2010-08-23	0.00238915	-0.000396464	-0.00404853	0.000957052	0.00757427	-0.00685286	-0.0104781	0.00566602	-0.00146846
2010-08-24	-0.00454858	-0.0139762	-0.0146188	-0.012635	-0.0151676	-0.0134224	-0.0125976	-0.0153702	-0.00973058
2010-08-25	-0.0057746	-0.00229026	0.00328398	-0.00607356	-0.00907911	-0.016788	-0.0054325	-0.00932875	-0.00966244
2010-08-26	0.0131656	0.0152746	-0.00771448	0.00221468	0.00904031	0.00688268	-0.0145491	0.00840956	-0.000755376
2010-08-27	0.00486201	0.00585308	0.0164507	0.00650555	0.00884398	0.00945165	0.0265442	0.00833755	0.00508076
2010-08-31	0.0105041	0.00681242	-0.0144379	-0.00437002	0.0045268	-0.0187487	-0.00673146	0.000375835	0.00200541
2010-09-01	0.0118172	0.0153759	0.0290777	0.0264281	0.0266642	0.0116006	0.029166	0.028945	0.0144047
2010-09-02	0.0029655	0.00965795	0.00903991	-8.21845e-06	0.000856818	0.0150999	-0.00395874	0.000777359	0.0036541
2010-09-03	0.00218456	0.00611426	0.0131324	0.00831042	0.0105751	0.00564342	-0.00193277	0.00950245	0.00504977
2010-09-06	0.00167273	0.0055483	-0.0115375	0.00332312	0.00204283	0.0203304	0.00101929	0.00265062	0.00731407
2010-09-07	-0.00581399	-0.0122233	0	-0.00605399	-0.00578963	-0.00813074	-0.00510688	-0.00776093	-0.00189657
2010-09-08	-0.00228537	-0.00228465	0.00641803	0.00758003	0.00404153	-0.0220714	0	0.00618009	-0.00364146
2010-09-13	0.0268927	0.0367926	0.0207413	0.0156512	0.0247029	0.0324037	0.024161	0.0203958	0.0224185
2010-09-14	0.00350925	0.000956115	-0.00071333	0.0021903	0.000341331	-0.00241769	-0.00499548	0.000484693	0.000165775
2010-09-15	0.0145976	0.0186993	0.00353491	-0.00215996	-0.00212173	0.0230932	0.00611199	-0.00329113	0.00332319
2010-09-16	0.00527176	0.00621222	-0.000364488	-0.0019534	-0.00279388	-0.00074214	-0.0065405	-0.00338583	-0.00488258
2010-09-17	0.00202547	-0.000664324	0.000826575	-0.00640321	-0.0057202	0.0121858	-0.00851941	-0.00511961	0.00310674
2010-09-20	0.00667243	0.00660358	0.0150953	0.0135667	0.0169206	-0.00249425	0.0162778	0.0145108	0.00677113
2010-09-21	-0.00256732	0.000326055	-0.00256737	-0.0029593	-0.00470539	0	-0.00693114	-0.00263623	0.000791961
2010-09-22	0.00551167	0.010378	-0.00483717	-0.0108377	-0.00436733	-0.00373427	0.00890894	-0.00954036	0.000318169
2010-09-23	-0.00445382	-0.00688954	-0.00836618	-0.00381182	-0.000864943	-0.00994336	0.0068408	-0.00418782	-0.000237889
2010-09-24	0.000761169	0.00231497	0.0209728	0.0181996	0.00922344	0	-0.00873062	0.0136059	0.00137714
2010-09-27	0.00598766	0.0127799	-0.00568354	-0.00308654	-0.00449342	0.0137849	0.00905036	-0.00465391	0.00553358
2010-09-28	0.0147845	0.0159425	0.00483873	-0.000446038	0.000896716	-0.0112447	0.00596913	0.000129939	-0.00096579
2010-09-29	-0.000587001	0.0101835	-0.00259114	-0.00465863	-0.00163262	0.00667749	0	-0.00372329	0.00614526
2010-09-30	0.00339599	0.00878905	-0.00308846	-0.00286952	-0.00372373	-0.0200791	0.00291365	-0.00205212	0.00351221
2010-10-01	-0.0136489	-0.0105965	0.00440668	-0.00284236	0.00795229	0.00371587	0.0114423	-5.63922e-05	0.00517492
2010-10-04	0.00816949	0.00824221	-0.00806742	-0.0124954	-0.00661951	-0.00246683	0.00221884	-0.00841922	0.00492546
2010-10-05	0.0131861	0.0113096	0.0206467	0.013218	0.0142607	0.0145718	0.0126777	0.0157708	0.00348178
2010-10-06	0.00895916	0.0275942	-0.000672205	0.00879351	0.00805857	0.0179774	-0.0104638	0.00736494	0.00495426
2010-10-07	-0.00180741	0.000886129	-0.00164795	0.000879893	-0.00340283	-0.000683311	-0.00887097	7.76185e-05	-0.00529213
2010-10-08	0.00684109	0.000196004	0.00610364	0.00245387	-0.000795074	-0.00995459	0.012663	-0.000715553	0.000977497
2010-10-11	0.0261762	0.037795	0.000145893	0.00283148	0.00261254	-0.0211036	0.00193291	0.00302371	0.00322638
2010-10-12	0.0097368	0.000373868	0.00381142	-0.000783252	-0.00190577	0	0.010223	-0.0028119	-0.00408514
2010-10-13	0.00703383	0.0156842	0.00709582	0.0204025	0.015041	0.00158258	0	0.0169232	0.0118022
2010-10-14	-0.0135041	-0.00412852	-0.0036481	0.0032196	-0.00352082	0.0189609	0.000237154	-0.00261846	0.00503486
2010-10-15	0.0125677	0.0076885	0.00202553	0.00572001	-0.00416427	-0.0087258	0.00192305	-0.00085113	-0.0031618
2010-10-18	0.00507645	-0.00814098	0.00721762	0.00374051	0.00683217	-0.000185275	-0.0013095	0.00382699	-0.00522797
2010-10-19	-0.00882763	-0.00769588	-0.0160047	-0.00398853	-0.0067445	0.00430299	-0.0264422	-0.00475292	-0.00603372
2010-10-20	-0.00681323	-0.0113267	0.0104691	0.00520314	0.00437339	-0.0166855	0.00771379	0.00438164	0.000442375
2010-10-21	0.0155319	0.0220962	0.00177237	0.0131645	0.00504928	-0.000545898	-0.0107529	0.00850481	0.00498487
2010-10-22	0.00786829	0.00179629	0.00238645	-0.000782335	-0.00286974	0.00534272	-0.0017531	-0.00251091	8.92462e-05
2010-10-25	-0.0011693	0.00852098	0.00214464	0.00503887	0.00184454	-0.00271406	0.000718856	0.00249715	0.00688119
2010-10-26	-0.00250031	-0.00640193	1.68687e-05	-0.00383461	-0.00780156	-0.00253268	0.016534	-0.00624031	0.00283012
2010-10-27	-0.0309813	-0.0427355	-0.00269416	-0.006949	-0.0107987	0.00102854	-0.00242023	-0.00775805	-0.0101518
2010-11-01	0.00705814	0.0144326	0.00163087	0.00559637	0.00857103	-0.0250594	0.0139593	0.00423976	0.0142536
2010-11-02	-0.00802525	-0.00130669	0.00772939	0.00745902	0.0109676	0.000574402	0.00479557	0.0079555	0.000465516
2010-11-03	0.0012021	0.00703944	0.00367129	-0.00550178	-0.00146006	0.0214709	0	-0.00542631	0.00599217
2010-11-04	0.0329864	0.0426703	0.0190992	0.0175088	0.0196014	0	0.0150588	0.016419	0.0107368
2010-11-05	-0.00178199	-0.00437412	0.00391515	0.00289275	0.00214684	0.0281518	-0.00534331	-0.00112841	0.00416555
2010-11-08	0.00228493	-0.00573413	-0.00212323	-0.000547957	-0.00433248	0.0110472	0.000688402	-0.00213749	0.0031282
2010-11-09	0.00845291	0.00852324	-0.00808491	0.00551178	0.00429844	-0.00395627	-0.0135519	0.00581144	-0.00164429
2010-11-10	-0.0138243	-0.0166026	0.00436659	-0.010064	-0.00997263	0.0139341	-0.000572158	-0.010571	-0.00222121
2010-11-11	-0.00676993	-0.0118771	-0.00425121	0.000531122	-0.000292295	0.0031424	-0.00620307	-0.003419	-0.00765256
2010-11-12	-0.00761788	-0.0173366	-0.0118787	0.00166443	-0.00315189	-0.0139539	-0.0116982	-0.0026169	-0.0113773
2010-11-15	0.00637747	0.00637886	-0.00121821	0.00821608	0.0040457	0.0105052	-0.0104858	0.0069721	-0.00143908
2010-11-22	-0.0300419	-0.0356327	7.51381e-05	0.00468403	-0.0242769	0.0288527	0	-0.0137625	-0.00182751
2010-11-23	-0.0237018	-0.0375411	-0.014387	-0.0173065	-0.0176703	-0.00844669	-0.0244223	-0.0200065	-0.0153
2010-11-24	0.0134063	-0.000448648	0.0148127	0.017563	0.0134897	0	0.0243649	0.010219	0.00559022
2010-11-25	-0.00121819	0.00353471	-0.00749663	0.00815273	0.00736178	0.00493788	-0.00384198	0.00565677	0.000366897
2010-11-26	-0.0150214	-0.0236311	0	-0.0044695	-0.00531336	-0.00399616	-0.0165134	-0.00582291	-0.00908814
2010-11-29	-0.0318808	-0.0347794	-0.0013798	-0.0222952	-0.0209817	0.0085721	-0.00467188	-0.0201189	0.000543172
2010-11-30	0.0197605	0.0111793	-0.00608875	-0.00141636	-0.00409774	-0.0188362	-0.00299382	-0.00551361	-0.00499791
2010-12-01	0.012248	0.0191463	0.0213867	0.0262853	0.0204469	0.00512019	0.0239484	0.0224169	0.0154636
2010-12-02	0.0117645	0.016953	0.012737	0.0131626	0.0219288	0.0179073	0.0026067	0.0190005	0.0116477
2010-12-03	-0.00117923	0.0041029	0.00259991	-0.00142248	-0.00387392	0.000963295	0.00343162	-0.00135864	0.00213372
2010-12-06	0.0126612	0.0103565	-0.00129911	0.000958129	0.00434194	-0.00109016	-0.00307211	-0.000184585	0.00295121
2010-12-07	0.00238034	0.0081574	0.000514944	0.00681129	0.00659829	-0.00257333	-0.00308158	0.00813522	0.00106852
2010-12-08	-0.00249096	-0.0124624	0.0036949	-0.00372592	-0.00241317	0.00895584	-0.0169152	0.00156935	-0.00764955
2010-12-09	-0.0268051	-0.0318529	0.00383541	-0.00168005	0.00232709	0.00521977	-0.00435122	0.00230703	0.000968207
2010-12-10	-0.0176762	-0.0200897	0.00598368	0.00601419	0.000860511	-0.00721348	0.0067978	0.000681404	-0.000892236
2010-12-13	0.0247294	0.0221883	4.83703e-05	0.00330874	0.00818932	0.00799191	0.0114064	0.00568732	0.00515013
2010-12-14	0.00194552	0.00468932	0.000910538	-0.000283137	0.0051736	0.00222021	-0.00555601	0.00294485	0.0029709
2010-12-15	-0.01531	-0.0267033	-0.00513563	-0.0015708	-0.00152887	-0.000677767	-0.0127808	-0.00306653	-0.0054337
2010-12-16	-0.0164666	-0.0196412	0.00616603	0.00114381	-0.000187022	0.000146452	-0.00834473	0.000570854	-0.00528079
2010-12-17	-0.0141507	-0.0169853	0.000836423	-0.00598994	-0.00158259	-0.000723741	0.00997887	-0.00357255	0.00362642
2010-12-20	-0.000355833	-0.0173917	0.00254517	0.00516391	0.00336638	-0.00852042	-0.0106031	0.00373754	-0.00356499
2010-12-21	0.0205439	0.0182172	0.00601198	0.0084262	0.0101661	0.0149729	0.0140393	0.0105567	0.0094689
2010-12-22	0.00952841	0.0121767	0.00337387	-0.00142373	0.00531199	-0.00232176	0.00374582	0.00113109	0.00132698
2010-12-23	0.0118301	0.0124789	-0.00164572	-0.00144843	0.00210358	-0.0065249	0.000219047	0.000888	-0.000207937
2010-12-24	0.000730038	0.00423297	0.000612494	-0.0123978	0.00213245	0	-0.0100229	0.000183047	-0.00247485
2010-12-27	0.00134576	0.000634	0	0	-0.00208241	0.00744363	0	-0.00586067	-0.00241669
2010-12-28	0.00128541	0.000438382	0.00077105	0.000196517	0	-0.00613699	0.00350402	0.000208575	-0.000195527
2010-12-29	0.00417148	-0.00558177	0.00100862	0.00334633	0	0.00503074	0.0133001	0.00192326	0.00786147
2010-12-30	0.00153465	0.0084385	-0.00150934	-0.011687	-0.00424487	-0.0112398	0.00510644	-0.00919071	0.00331358
2010-12-31	-0.0123118	-0.0068611	-0.000190815	0	-0.011979	0.0164041	0.00943518	-0.00615786	0.00278939
2011-01-03	0.0240022	0.0175155	0.0112513	0.0108675	0.0191381	0	0	0.00963293	0.00816767
2011-01-04	0.0090402	0.0110476	-0.00131389	-0.00206085	0	0	0.00507557	0.00657653	0.00423876
2011-01-05	0.00885954	0.0117802	0.00499459	-0.00510667	0.00497604	-0.00166804	0.0109329	-0.000548291	-0.00118012
2011-01-06	0.00698236	0.00685022	-0.00212515	0.0059722	-0.0040453	0.0142505	-0.0072281	-0.000620243	-0.00264603
2011-01-07	-0.00783512	-0.0187548	-0.00184651	-0.00481722	-0.00586483	0.00107068	-0.00742345	-0.0054614	-0.00681971
2011-01-10	-0.0131088	-0.0263247	-0.00137728	-0.013152	-0.00468989	-0.00288433	0.000998688	-0.00984571	-0.00670868
2011-01-11	-0.00303548	0.00179477	0.00371822	0.0122492	0.0096406	0	0.00421203	0.012638	0.00477261
2011-01-12	0.00376053	0.00906405	0.00896727	0.0181599	0.00608388	0.000201679	0.0170359	0.0143967	0.0118722
2011-01-13	0.00954678	0.0162976	-0.00171225	0.000895086	-0.00443908	0.00729393	-0.0128133	-0.000367489	-0.00210932
2011-01-14	-0.010199	-0.00470023	0.00735743	8.33875e-05	-0.00362548	-0.00860367	0.00309189	-0.000761239	0.00023762
2011-01-17	-0.0155634	-0.0153677	0.00137544	0.00033348	-0.00273612	0.000363777	-0.00467683	-0.00214676	-0.00453671
2011-01-18	-0.00604941	0.00457953	0	0.00919599	0.0117423	0.00153364	0.00439487	0.0109948	0.00240588
2011-01-19	0.000520727	-0.00320901	-0.0101672	-0.00853219	-0.013247	0.00361737	-0.012229	-0.0106446	0.00108577
2011-01-20	-0.017835	-0.0316517	-0.00129577	-0.00829237	-0.0183718	-0.0114117	-0.00710503	-0.0100879	-0.010442
2011-01-21	0.00974406	-0.000510833	0.00241066	0.00541647	0.00482822	-0.0157198	-0.00618626	0.00839604	-0.00685352
2011-01-24	-0.0110671	-0.00742625	0.00581932	0.000757244	0.00804045	0.0068469	0.00424365	0.00415798	-0.00114475
2011-01-25	-0.00074888	0.00463865	0.00026336	-0.0012402	-0.00441762	0.011467	-0.0103956	-0.00404415	-0.000885489
2011-01-26	0.0123261	0.0054044	0.00421206	0.00963468	0.00866505	-0.00599245	0	0.0070969	0.00501853
2011-01-27	-0.0140821	-0.0149764	0.00224177	0.00395298	-0.000687095	0.00735233	-0.00962277	0.00191942	-0.0011489
2011-01-28	-0.0284982	-0.038599	-0.0180137	-0.0074034	-0.014131	-0.0113558	-0.0200825	-0.0104778	-0.00991192
2011-01-31	0.00105622	-0.00888303	0.00763333	-0.00357116	-0.00315047	-0.0118866	-0.00184584	-0.00264951	-0.00578872
2011-02-01	0.0241158	0.0352568	0.0165558	0.014976	0.0160569	0.00356662	0.018926	0.0150886	0.00622387
2011-02-02	0.00744676	0.0142386	-0.00272628	-8.35193e-05	0.00707485	0.0176409	-0.0172301	0.00161782	0.00363132
2011-02-03	-0.0244781	-0.0278502	0.00235147	0.00139247	-0.00280388	-0.00248938	0.00115396	-0.00288347	0.000476055
2011-02-04	0.0245066	0.0139592	0.0028801	0.00312702	0.00235379	0.0106948	-0.0226618	0.00276115	-0.00318493
2011-02-07	-0.0061961	0.00855289	0.00622074	0.00929811	0.00889751	0.00459132	0.00142386	0.00821668	-0.00334572
2011-02-08	0.00535559	0.00688571	0.0041761	0.00542486	0.00663798	0.00413982	0.00623796	0.00398028	-0.00449899
2011-02-09	0.00482299	-0.00325487	-0.0027897	-0.000319582	-0.00642316	-0.00170793	-0.0238955	-0.00302406	-0.0142486
2011-02-10	-0.0176644	-0.0249206	0.00074922	0.00264372	-0.00535111	-0.00114779	0.00559025	-0.00374242	-0.0147596
2011-02-11	0.00478229	0.00641822	0.00549224	0.00420353	0.00710097	0.0112409	0.0180771	0.00472719	0.00393088
2011-02-14	-0.00249793	0.000404514	0.00238214	0.00344398	-0.000461932	0	0.0121228	0.000168532	0.0134481
2011-02-15	0.00360638	0.000892722	-0.0032402	0.000460915	-0.00380254	0.00196813	-0.00326564	-0.00054988	-0.00143045
2011-02-16	0.00859906	0.0133999	0.00623799	0.00192516	0.00795226	0.00571749	0.0183708	0.00697461	0.00303899
2011-02-17	0.00931031	0.0159772	0.00307089	-0.00118625	0.000345034	0.00261955	0.00168569	-0.000580515	0.00103859
2011-02-18	0.000190969	-0.0016526	0.00192291	0.00287211	-0.000723066	0.00056828	0.00562792	0.000571574	0.00693787
2011-02-21	-0.013069	-0.013706	-0.0207422	-0.0142389	-0.0112749	0.00135758	-0.0119417	-0.0126153	-0.000957736
2011-02-22	-0.00724632	-0.0194419	0	-0.000472672	-0.0029971	-0.0179196	-0.0122516	-0.00546489	-0.0142969
