# Supplementary material
Source: ML conference proceedings conference paper supplement (https://openreview.net/forum?id=a30kyHbuXfI)
Supplement: supplementary_material [file egarch_101.xls]

## Sheet: perf
-2033.15	2017.67	26.8396	-613.73	599.432	3.93112
-2033.16	2017.69	26.8367	-613.678	599.444	3.93285
-2033.16	2017.69	26.8367	-613.671	599.444	3.93299
	2017.64	26.8575		599.374	3.92278
	2017.68	26.8194		599.444	3.93227

## Sheet: par
-0.00332742	0.414223	0.929165
-0.00334486	0.41611	0.928615
-0.00334288	0.416267	0.928564
-0.00320265	0.406309	0.931567
-0.00312886	0.415293	0.929184

## Sheet: tpar
-0.00332742	0.414223	0.929165
-0.00334486	0.41611	0.928615
-0.00334288	0.416267	0.928564
-0.00320795	0.404884	0.931817
-0.00312886	0.415293	0.929184

## Sheet: main
w	alpha_1	beta_1	tr_lb	tr_ll	tr_mse	te_lb	te_ll	te_mse
-0.00332742	0.414223	0.929165	-2033.15	2017.67	26.8396	-613.73	599.432	3.93112
-0.00334486	0.41611	0.928615	-2033.16	2017.69	26.8367	-613.678	599.444	3.93285
-0.00334288	0.416267	0.928564	-2033.16	2017.69	26.8367	-613.671	599.444	3.93299
-0.00320265	0.406309	0.931567		2017.64	26.8575		599.374	3.92278
-0.00312886	0.415293	0.929184		2017.68	26.8194		599.444	3.93227
