# Supplementary material
Source: ML conference proceedings conference paper supplement (https://openreview.net/forum?id=a30kyHbuXfI)
Supplement: supplementary_material [file egarch_111.xls]

## Sheet: perf
-1995.54	1974.97	26.1927	-608.059	589.076	4.12822
-1995.69	1975.21	26.2307	-608.097	589.579	4.17068
-1995.69	1975.21	26.2336	-608.093	589.574	4.17004
	1974.92	26.1652		588.652	4.09396
	1974.98	26.2078		589.091	4.12887

## Sheet: par
-0.0149402	0.350284	-0.171229	0.929576
-0.0152177	0.364154	-0.174198	0.926155
-0.0152571	0.363975	-0.174163	0.926134
-0.0147523	0.339942	-0.169262	0.932332
-0.0152028	0.35032	-0.171514	0.929311

## Sheet: tpar
-0.0149402	0.350284	-0.171229	0.929576
-0.0152177	0.364154	-0.174198	0.926155
-0.0152571	0.363975	-0.174163	0.926134
-0.0146828	0.338045	-0.168874	0.93268
-0.0152028	0.35032	-0.171514	0.929311

## Sheet: main
w	alpha_1	gamma_1	beta_1	tr_lb	tr_ll	tr_mse	te_lb	te_ll	te_mse
-0.0149402	0.350284	-0.171229	0.929576	-1995.54	1974.97	26.1927	-608.059	589.076	4.12822
-0.0152177	0.364154	-0.174198	0.926155	-1995.69	1975.21	26.2307	-608.097	589.579	4.17068
-0.0152571	0.363975	-0.174163	0.926134	-1995.69	1975.21	26.2336	-608.093	589.574	4.17004
-0.0147523	0.339942	-0.169262	0.932332		1974.92	26.1652		588.652	4.09396
-0.0152028	0.35032	-0.171514	0.929311		1974.98	26.2078		589.091	4.12887
