# Supplementary material
Source: ML conference proceedings conference paper supplement (https://openreview.net/forum?id=a30kyHbuXfI)
Supplement: supplementary_material [file egarch_112.xls]

## Sheet: perf
-1998.67	1975.03	26.2345	-610.848	589.168	4.14285
-1999.55	1976	26.5718	-611.098	590.33	4.29081
-1999.55	1976.01	26.5894	-611.083	590.299	4.29285
	1974.9	26.1127		588.628	4.0777
	1974.99	26.2139		589.072	4.12751

## Sheet: par
-0.0149214	0.35495	-0.172641	0.917286	0.0113746
-0.0156848	0.394921	-0.185245	0.85864	0.0612969
-0.0156317	0.394941	-0.185703	0.855223	0.0646547
-0.0146669	0.335267	-0.166342	0.954592	-0.0215665
-0.014903	0.350787	-0.170808	0.925207	0.00420037

## Sheet: tpar
-0.0149214	0.35495	-0.172641	0.917286	0.0113746
-0.0156848	0.394921	-0.185245	0.85864	0.0612969
-0.0156317	0.394941	-0.185703	0.855223	0.0646547
-0.0146066	0.333653	-0.16612	0.953763	-0.0204361
-0.014903	0.350787	-0.170808	0.925207	0.00420037

## Sheet: main
w	alpha_1	gamma_1	beta_1	beta_2	tr_lb	tr_ll	tr_mse	te_lb	te_ll	te_mse
-0.0149214	0.35495	-0.172641	0.917286	0.0113746	-1998.67	1975.03	26.2345	-610.848	589.168	4.14285
-0.0156848	0.394921	-0.185245	0.85864	0.0612969	-1999.55	1976	26.5718	-611.098	590.33	4.29081
-0.0156317	0.394941	-0.185703	0.855223	0.0646547	-1999.55	1976.01	26.5894	-611.083	590.299	4.29285
-0.0146669	0.335267	-0.166342	0.954592	-0.0215665		1974.9	26.1127		588.628	4.0777
-0.014903	0.350787	-0.170808	0.925207	0.00420037		1974.99	26.2139		589.072	4.12751
