# Supplementary material
Source: ML conference proceedings conference paper supplement (https://openreview.net/forum?id=a30kyHbuXfI)
Supplement: supplementary_material [file figarch_001.xls]

## Sheet: perf
-2007.5	2000.06	25.6709	-604.274	598.356	3.97824
-2007.5	2000.06	25.6719	-604.264	598.361	3.97849
-2007.5	2000.06	25.6729	-604.275	598.358	3.97817
	2000.02	25.7218		598.132	3.97067
	2000.13	25.6656		598.654	3.98863

## Sheet: par
0.0996448	0.647314	0.417552
0.0997237	0.647926	0.418095
0.0996946	0.647947	0.418285
0.102365	0.656875	0.432063
0.0994093	0.656193	0.421953

## Sheet: tpar
-2.30614	0.607252	0.597369
-2.30535	0.609935	0.598366
-2.30564	0.610028	0.599553
-2.27921	0.649398	0.653311
-2.30851	0.646373	0.588551

## Sheet: main
w	d_1	beta_1	tr_lb	tr_ll	tr_mse	te_lb	te_ll	te_mse
0.0996448	0.647314	0.417552	-2007.5	2000.06	25.6709	-604.274	598.356	3.97824
0.0997237	0.647926	0.418095	-2007.5	2000.06	25.6719	-604.264	598.361	3.97849
0.0996946	0.647947	0.418285	-2007.5	2000.06	25.6729	-604.275	598.358	3.97817
0.102365	0.656875	0.432063		2000.02	25.7218		598.132	3.97067
0.0994093	0.656193	0.421953		2000.13	25.6656		598.654	3.98863
