# Supplementary material
Source: ML conference proceedings conference paper supplement (https://openreview.net/forum?id=a30kyHbuXfI)
Supplement: supplementary_material [file figarch_100.xls]

## Sheet: perf
-2021.39	2012.92	26.0086	-610.683	603	4.1366
-2021.39	2012.91	26.0084	-610.699	602.99	4.13615
-2021.39	2012.93	26.0082	-610.691	603.002	4.13682
	2012.43	25.9966		602.847	4.1255
	2012.94	26.0112		603.009	4.13638

## Sheet: par
0.0891057	0.00541205	0.305623
0.0890934	0.00523584	0.305612
0.0891151	0.00545034	0.30569
0.0869119	5.24671e-09	0.306296
0.0891008	0.00558913	0.305288

## Sheet: tpar
-2.41793	-4.14553	-0.820662
-2.41807	-4.17916	-0.820716
-2.41783	-4.13827	-0.820345
-2.44286	-18.0068	-0.817494
-2.41799	-4.11331	-0.822241

## Sheet: main
w	phi_1	d_1	tr_lb	tr_ll	tr_mse	te_lb	te_ll	te_mse
0.0891057	0.00541205	0.305623	-2021.39	2012.92	26.0086	-610.683	603	4.1366
0.0890934	0.00523584	0.305612	-2021.39	2012.91	26.0084	-610.699	602.99	4.13615
0.0891151	0.00545034	0.30569	-2021.39	2012.93	26.0082	-610.691	603.002	4.13682
0.0869119	5.24671e-09	0.306296		2012.43	25.9966		602.847	4.1255
0.0891008	0.00558913	0.305288		2012.94	26.0112		603.009	4.13638
