# Supplementary material
Source: ML conference proceedings conference paper supplement (https://openreview.net/forum?id=a30kyHbuXfI)
Supplement: supplementary_material [file figarch_101.xls]

## Sheet: perf
-2007.62	1999.69	25.7733	-604.743	598.445	3.98802
-2007.62	1999.69	25.7726	-604.723	598.44	3.98768
-2007.62	1999.69	25.7708	-604.729	598.445	3.98809
	1999.67	25.7835		598.181	3.97931
	1999.74	25.7665		598.652	3.99555

## Sheet: par
0.0998152	0.05925	0.663455	0.481325
0.0997217	0.0592428	0.662841	0.480829
0.0997324	0.0590954	0.662664	0.480308
0.100277	0.062157	0.655716	0.479968
0.0994297	0.0595068	0.668713	0.483457

## Sheet: tpar
-2.30443	-0.60979	0.678728	0.69017
-2.30537	-0.612788	0.675981	0.689659
-2.30526	-0.617435	0.675188	0.687763
-2.29982	-0.570681	0.64426	0.701847
-2.3083	-0.578638	0.702369	0.680673

## Sheet: main
w	phi_1	d_1	beta_1	tr_lb	tr_ll	tr_mse	te_lb	te_ll	te_mse
0.0998152	0.05925	0.663455	0.481325	-2007.62	1999.69	25.7733	-604.743	598.445	3.98802
0.0997217	0.0592428	0.662841	0.480829	-2007.62	1999.69	25.7726	-604.723	598.44	3.98768
0.0997324	0.0590954	0.662664	0.480308	-2007.62	1999.69	25.7708	-604.729	598.445	3.98809
0.100277	0.062157	0.655716	0.479968		1999.67	25.7835		598.181	3.97931
0.0994297	0.0595068	0.668713	0.483457		1999.74	25.7665		598.652	3.99555
