# Supplementary material
Source: ML conference proceedings conference paper supplement (https://openreview.net/forum?id=a30kyHbuXfI)
Supplement: supplementary_material [file garch_100.xls]

## Sheet: perf
-2247.14	2241.03	29.8183	-651.11	645.747	5.4467
-2247.14	2241.03	29.8182	-651.107	645.745	5.44666
-2247.14	2241.03	29.8153	-651.105	645.744	5.44541
	2241.01	29.6941		645.661	5.39096
	2241.04	29.82		645.726	5.44749

## Sheet: par
0.518629	0.640169
0.51865	0.64016
0.518662	0.639891
0.519346	0.628169
0.51883	0.64033

## Sheet: tpar
-0.656567	0.576655
-0.656525	0.576613
-0.656503	0.575448
-0.655185	0.524373
-0.656178	0.577351

## Sheet: main
w	alpha_1	tr_lb	tr_ll	tr_mse	te_lb	te_ll	te_mse
0.518629	0.640169	-2247.14	2241.03	29.8183	-651.11	645.747	5.4467
0.51865	0.64016	-2247.14	2241.03	29.8182	-651.107	645.745	5.44666
0.518662	0.639891	-2247.14	2241.03	29.8153	-651.105	645.744	5.44541
0.519346	0.628169		2241.01	29.6941		645.661	5.39096
0.51883	0.64033		2241.04	29.82		645.726	5.44749
