# Supplementary material
Source: ML conference proceedings conference paper supplement (https://openreview.net/forum?id=a30kyHbuXfI)
Supplement: supplementary_material [file garch_101.xls]

## Sheet: perf
-2012.4	2002.56	25.6907	-607.696	598.678	3.95337
-2012.4	2002.56	25.6927	-607.69	598.673	3.95363
-2012.41	2002.56	25.6907	-607.7	598.678	3.95316
	2002.52	25.6831		598.918	3.94359
	2002.67	25.7228		598.433	3.95737

## Sheet: par
0.0427725	0.230372	0.73661
0.0427289	0.230441	0.736719
0.0427657	0.230286	0.736658
0.0420801	0.22637	0.738296
0.042668	0.231342	0.738357

## Sheet: tpar
-3.15186	-1.20595	3.11109
-3.15288	-1.20556	3.11669
-3.15202	-1.20644	3.10999
-3.16818	-1.22892	3.03957
-3.15431	-1.20049	3.19988

## Sheet: main
w	alpha_1	beta_1	tr_lb	tr_ll	tr_mse	te_lb	te_ll	te_mse
0.0427725	0.230372	0.73661	-2012.4	2002.56	25.6907	-607.696	598.678	3.95337
0.0427289	0.230441	0.736719	-2012.4	2002.56	25.6927	-607.69	598.673	3.95363
0.0427657	0.230286	0.736658	-2012.41	2002.56	25.6907	-607.7	598.678	3.95316
0.0420801	0.22637	0.738296		2002.52	25.6831		598.918	3.94359
0.042668	0.231342	0.738357		2002.67	25.7228		598.433	3.95737
