# Supplementary material
Source: ML conference proceedings conference paper supplement (https://openreview.net/forum?id=a30kyHbuXfI)
Supplement: supplementary_material [file gjr_111.xls]

## Sheet: perf
-1988.71	1976.08	27.2139	-604.563	592.906	4.49203
-1988.7	1976.09	27.2431	-604.559	592.905	4.49741
-1988.7	1976.08	27.2385	-604.585	592.926	4.49723
	1976.03	27.1431		593.289	4.47596
	1976.24	27.3862		592.579	4.51475

## Sheet: par
0.0435803	0.107959	0.292139	0.721407
0.0435512	0.108283	0.292868	0.721278
0.0435598	0.108209	0.293002	0.721115
0.0423834	0.10767	0.28919	0.722384
0.0434389	0.109131	0.293967	0.723376

## Sheet: tpar
-3.13315	-2.11154	-1.31586	3.38809
-3.13382	-2.10817	-1.3123	3.41114
-3.13362	-2.10894	-1.31216	3.4038
-3.161	-2.11476	-1.32661	3.34984
-3.1364	-2.09942	-1.30559	3.57283

## Sheet: main
w	alpha_1	gamma_1	beta_1	tr_lb	tr_ll	tr_mse	te_lb	te_ll	te_mse
0.0435803	0.107959	0.292139	0.721407	-1988.71	1976.08	27.2139	-604.563	592.906	4.49203
0.0435512	0.108283	0.292868	0.721278	-1988.7	1976.09	27.2431	-604.559	592.905	4.49741
0.0435598	0.108209	0.293002	0.721115	-1988.7	1976.08	27.2385	-604.585	592.926	4.49723
0.0423834	0.10767	0.28919	0.722384		1976.03	27.1431		593.289	4.47596
0.0434389	0.109131	0.293967	0.723376		1976.24	27.3862		592.579	4.51475
