# Supplementary material
Source: ML conference proceedings conference paper supplement (https://openreview.net/forum?id=a30kyHbuXfI)
Supplement: supplementary_material [file gjr_112.xls]

## Sheet: perf
-1988.39	1976.12	27.8157	-604.333	593.675	4.63817
-1988.38	1976.1	27.7672	-604.321	593.654	4.62846
-1988.39	1976.11	27.7975	-604.347	593.664	4.63468
	1976.01	27.2675		593.377	4.51511
	1976.12	27.7781		593.628	4.6289

## Sheet: par
0.0446283	0.115714	0.323089	0.654536	0.04878
0.044647	0.115271	0.321739	0.65346	0.0501613
0.044666	0.115558	0.322698	0.653346	0.0499656
0.0437258	0.110272	0.300876	0.672157	0.0409283
0.0443804	0.114204	0.320971	0.669617	0.0362792

## Sheet: tpar
-3.10939	-2.03343	-1.19187	2.26434	0.931098
-3.10897	-2.03777	-1.19751	2.23094	0.917586
-3.10854	-2.03496	-1.19361	2.2401	0.936731
-3.12982	-2.08797	-1.27988	2.30384	0.445943
-3.11496	-2.04827	-1.20372	2.49046	0.635636

## Sheet: main
w	alpha_1	gamma_1	beta_1	beta_2	tr_lb	tr_ll	tr_mse	te_lb	te_ll	te_mse
0.0446283	0.115714	0.323089	0.654536	0.04878	-1988.39	1976.12	27.8157	-604.333	593.675	4.63817
0.044647	0.115271	0.321739	0.65346	0.0501613	-1988.38	1976.1	27.7672	-604.321	593.654	4.62846
0.044666	0.115558	0.322698	0.653346	0.0499656	-1988.39	1976.11	27.7975	-604.347	593.664	4.63468
0.0437258	0.110272	0.300876	0.672157	0.0409283		1976.01	27.2675		593.377	4.51511
0.0443804	0.114204	0.320971	0.669617	0.0362792		1976.12	27.7781		593.628	4.6289
