# Supplementary material
Source: ML conference proceedings conference paper supplement (https://openreview.net/forum?id=a30kyHbuXfI)
Supplement: supplementary_material [file Har_tables.xls]

## Sheet: perf
-5082.83	-5060.65	24.179	-1240.01	-1220.23	18.8574
-5083.02	-5060.65	24.179	-1240.3	-1220.26	18.8597
-5082.83	-5060.65	24.179	-1240	-1220.23	18.8575
-5085.54	-5060.68	24.1794	-1242.81	-1220.4	18.867
-5085.61	-5060.7	24.18	-1242.97	-1220.42	18.8688
-5085.54	-5060.67	24.1793	-1242.81	-1220.4	18.8663
	-5060.64	24.179		-1220.04	18.8554
	-5060.63	24.179		-1220.03	18.8571

## Sheet: est
1.07809	0.488434	0.420422	-0.0116591	4.9274
1.06321	0.488359	0.420757	-0.0109266	4.92803
1.0782	0.488435	0.420436	-0.0116791	4.92759
1.08457	0.490612	0.421471	-0.0156697	4.93205
1.06732	0.493247	0.419893	-0.0156461	4.93227
1.0845	0.490324	0.421497	-0.015379	4.93223
1.06736	0.489342	0.419599	-0.0107199	4.91883
1.07906	0.488399	0.420415	-0.0116575	4.91721
