# Supplementary material
Source: ML conference proceedings conference paper supplement (https://openreview.net/forum?id=a30kyHbuXfI)
Supplement: supplementary_material [file Labour_tables.xls]

## Sheet: par
0.682272	-1.48867	-0.0847192	-0.575232	0.492493	-0.642056	0.610904	0.0452288
0.682253	-1.48865	-0.0847166	-0.575225	0.492489	-0.642054	0.6109	0.0452401
0.682285	-1.48877	-0.0847174	-0.575249	0.492514	-0.642076	0.610925	0.0452443
0.678032	-1.4871	-0.083996	-0.574341	0.492763	-0.638388	0.609132	0.0480687
0.678011	-1.48708	-0.0839932	-0.574335	0.492758	-0.638388	0.60913	0.0480824
0.678035	-1.48711	-0.0839964	-0.574342	0.492764	-0.638389	0.609133	0.048068
0.577845	-1.43101	-0.0566387	-0.541698	0.493267	-0.637141	0.59265	0.103647
0.575756	-1.42999	-0.0561691	-0.54122	0.493229	-0.637616	0.592829	0.105093
0.578886	-1.43168	-0.0569395	-0.542053	0.493268	-0.637111	0.592746	0.103155
0.575283	-1.43089	-0.0571164	-0.54296	0.492545	-0.634853	0.593098	0.107281
0.573	-1.42978	-0.0566025	-0.54244	0.492505	-0.635363	0.593285	0.108855
0.576235	-1.43147	-0.057391	-0.543281	0.492541	-0.634798	0.593161	0.106802
0.678598	-1.487	-0.0839911	-0.573779	0.493127	-0.638045	0.606887	0.0474796
0.678999	-1.47619	-0.0847958	-0.570607	0.484862	-0.625157	0.598992	0.0448702

## Sheet: perf
-356.642	-332.992	0.712766	0.712187	0.703062	0.707595	-134.814	-113.854	0.698413	0.678921	0.673611	0.676256
-356.642	-332.991	0.712766	0.712187	0.703062	0.707595	-134.814	-113.854	0.698413	0.678921	0.673611	0.676256
-356.642	-332.992	0.712766	0.712187	0.703062	0.707595	-134.804	-113.854	0.698413	0.678921	0.673611	0.676256
-356.635	-332.99	0.710993	0.710147	0.701454	0.705774	-134.805	-113.855	0.698413	0.678921	0.673611	0.676256
-356.635	-332.99	0.710993	0.710147	0.701454	0.705774	-134.805	-113.855	0.698413	0.678921	0.673611	0.676256
-356.635	-332.99	0.710993	0.710147	0.701454	0.705774	-134.805	-113.855	0.698413	0.678921	0.673611	0.676256
-358.423	-333.124	0.710993	0.710147	0.701454	0.705774	-136.864	-114.171	0.666667	0.644238	0.639957	0.64209
-358.428	-333.129	0.710993	0.710147	0.701454	0.705774	-136.871	-114.178	0.666667	0.644238	0.639957	0.64209
-358.419	-333.121	0.710993	0.710147	0.701454	0.705774	-136.857	-114.167	0.666667	0.644238	0.639957	0.64209
-358.421	-333.127	0.70922	0.70812	0.699846	0.703959	-136.876	-114.22	0.666667	0.644238	0.639957	0.64209
-358.427	-333.133	0.70922	0.70812	0.699846	0.703959	-136.883	-114.228	0.666667	0.644238	0.639957	0.64209
-358.418	-333.124	0.70922	0.70812	0.699846	0.703959	-136.871	-114.217	0.666667	0.644238	0.639957	0.64209
	-332.99	0.710993	0.710147	0.701454	0.705774		-113.838	0.698413	0.678921	0.673611	0.676256
	-332.983	0.70922	0.708442	0.699478	0.703931		-113.8	0.70922	0.708442	0.699478	0.703931

## Sheet: var
0.0424165	0.0546495	0.00600929	0.0147872	0.0121974	0.0193143	0.018793	0.0447707
0.0424031	0.0557382	0.00614553	0.0150646	0.0128799	0.0212653	0.0192661	0.0439299
0.0425531	0.0548361	0.0060298	0.0148417	0.0122384	0.0193833	0.018863	0.0449285
0.0406771	0.0541459	0.00594396	0.0146362	0.012898	0.0204295	0.0196759	0.0438492
0.040694	0.0541642	0.00597516	0.0146884	0.012869	0.0205764	0.0197415	0.0438735
0.0406781	0.0541483	0.00594409	0.0146366	0.0128984	0.0204302	0.0196764	0.0438502
0.00908826	0.0335633	0.0025486	0.00894612	0.00988153	0.00954776	0.00993551	0.0128618
0.009087	0.0335556	0.00254818	0.008945	0.00988123	0.00954982	0.00993442	0.0128612
0.00910035	0.0336325	0.00255142	0.00895681	0.00989239	0.00956273	0.0099466	0.01288
0.00870862	0.0339075	0.00252046	0.0089687	0.010511	0.009995	0.0100622	0.0131341
0.00870729	0.0338991	0.00252001	0.00896747	0.0105106	0.00999734	0.0100609	0.0131334
0.00871543	0.0339424	0.00252193	0.00897386	0.0105164	0.010001	0.0100703	0.0131469
0.0396682	0.0536437	0.00588714	0.014065	0.0127383	0.0207127	0.019661	0.0424756
0.0407871	0.054357	0.00589187	0.0145743	0.0127618	0.0205942	0.0196049	0.0439274

## Sheet: cov_emgvb_mgvb
0	-0.0163925	-0.00847817	-0.00696798	0.00163422	0.00262308	0.00192406	-0.027087
-0.0163373	0	0.00298113	0.0142497	-0.00451472	-0.000204246	0.000840877	-0.00117831
-0.0081047	0.00288145	0	0.00413322	0.000655112	0.000503218	-0.00064351	-0.00109298
-0.00700293	0.0139313	0.00405892	0	0.0003899	0.00127685	-0.00188818	-0.00397273
0.000766716	-0.00361052	0.00127234	0.000827792	0	-0.00134649	-0.00258535	-0.00190842
0.00311895	-0.000512488	7.62768e-05	0.000684346	-0.00144441	0	-0.0132156	-0.00611222
0.00176232	0.000725934	-0.000213269	-0.000957071	-0.00230324	-0.0120244	0	-0.000279325
-0.0280934	-0.000483231	-0.00102914	-0.00380549	-0.00218194	-0.00633414	-0.00072557	0

## Sheet: cov_mcmc_glm
0	-0.0157792	-0.00799658	-0.00683724	0.00067061	0.00317933	0.00194336	-0.0270149
-0.0151029	0	0.00274457	0.0137822	-0.00422302	-0.000272043	0.000741408	-0.000836159
-0.00791461	0.00248783	0	0.00393299	0.0010175	0.000235131	-0.000577367	-0.000926924
-0.00653885	0.0130658	0.00380949	0	0.00067477	0.00116602	-0.00164169	-0.00352397
0.000469971	-0.0041369	0.0011098	0.000717621	0	-0.00172324	-0.00264719	-0.00108679
0.00334329	-0.000493859	5.82322e-05	0.000890268	-0.00177169	0	-0.0128577	-0.00613123
0.00171669	0.00111305	-0.000356436	-0.00137442	-0.00265756	-0.0128212	0	-0.000971285
-0.0260299	-0.000849564	-0.000970051	-0.0034891	-0.00119081	-0.00590301	-0.0010169	0

## Sheet: tab_logq
5.44088
5.44235
5.42664
5.35123
5.35168
5.3511
7.15888
7.15919
7.15344
7.10883
7.10918
7.1059

## Sheet: tab_n
10	0.687415	-1.49846	-0.0858581	-0.575512	0.500043	-0.635852	0.605165	0.0373102	-430.216	-356.687	-332.991	0.710993	0.710147	0.701454	0.705774	-134.865	-113.91	0.698413	0.678921	0.673611	0.676256	6.12409
20	0.681866	-1.49755	-0.0852023	-0.570577	0.499021	-0.640989	0.606926	0.0431457	-429.626	-356.667	-332.994	0.712766	0.712187	0.703062	0.707595	-134.899	-113.856	0.698413	0.678921	0.673611	0.676256	8.38022
30	0.683707	-1.49318	-0.0872135	-0.573255	0.495182	-0.639592	0.609396	0.0431767	-434.863	-356.653	-332.99	0.70922	0.708442	0.699478	0.703931	-134.793	-113.827	0.698413	0.678921	0.673611	0.676256	9.76408
50	0.680149	-1.49213	-0.0846557	-0.575632	0.493778	-0.642607	0.611496	0.0474637	-435.89	-356.645	-332.988	0.712766	0.712187	0.703062	0.707595	-134.805	-113.838	0.698413	0.678921	0.673611	0.676256	10.8178
75	0.682272	-1.48867	-0.0847192	-0.575232	0.492493	-0.642056	0.610904	0.0452288	-436.282	-356.642	-332.992	0.712766	0.712187	0.703062	0.707595	-134.814	-113.854	0.698413	0.678921	0.673611	0.676256	14.1452
100	0.682127	-1.48961	-0.0848415	-0.573901	0.493283	-0.639421	0.608772	0.0442505	-436.924	-356.64	-332.988	0.710993	0.710147	0.701454	0.705774	-134.81	-113.876	0.698413	0.678921	0.673611	0.676256	17.5824
150	0.680226	-1.48841	-0.0845956	-0.574456	0.49234	-0.639247	0.608752	0.0455755	-436.759	-356.64	-332.99	0.710993	0.710147	0.701454	0.705774	-134.791	-113.845	0.698413	0.678921	0.673611	0.676256	27.4349
200	0.680566	-1.48706	-0.0847148	-0.574357	0.492119	-0.638094	0.608219	0.0458359	-437.036	-356.638	-332.99	0.712766	0.712187	0.703062	0.707595	-134.788	-113.84	0.698413	0.678921	0.673611	0.676256	29.0023
300	0.680446	-1.48787	-0.0845397	-0.574899	0.492827	-0.638029	0.608891	0.0459869	-436.529	-356.639	-332.989	0.710993	0.710147	0.701454	0.705774	-134.832	-113.842	0.698413	0.678921	0.673611	0.676256	38.0501
