# Supplementary material
Source: ML conference proceedings conference paper supplement (https://openreview.net/forum?id=a30kyHbuXfI)
Supplement: supplementary_material [file Latex.xlsx]

## Sheet: Tables
			w	alpha_1	gamma_1	beta_1	beta_2	tr_lb	tr_ll	tr_mse	te_lb	te_ll	te_mse			$\omega$	$\alpha$	$\gamma$	$\beta_1$	$\beta_2$	$\LB\br{\theta^\star}$	$p\br{y\vert \theta^\star}$	MSE	$\LB\br{\theta^\star}$	$p\br{y\vert \theta^\star}$	MSE
																				ARCH
	garch_100	2	0.518629	0.640169	#N/A	#N/A	#N/A	-2247.14	2241.03	29.8183	-651.11	645.747	5.4467			0.518629	0.640169				-2247.14	2241.03	29.8183	-651.11	645.747	5.4467
		3	0.51865	0.64016	#N/A	#N/A	#N/A	-2247.14	2241.03	29.8182	-651.107	645.745	5.44666			0.51865	0.64016				-2247.14	2241.03	29.8182	-651.107	645.745	5.44666
		4	0.518662	0.639891	#N/A	#N/A	#N/A	-2247.14	2241.03	29.8153	-651.105	645.744	5.44541			0.518662	0.639891				-2247.14	2241.03	29.8153	-651.105	645.744	5.44541
		5	0.519346	0.628169	#N/A	#N/A	#N/A	0	2241.01	29.6941	0	645.661	5.39096			0.519346	0.628169					2241.01	29.6941		645.661	5.39096
		6	0.51883	0.64033	#N/A	#N/A	#N/A	0	2241.04	29.82	0	645.726	5.44749			0.51883	0.64033					2241.04	29.82		645.726	5.44749
																				GARCH(1,0,1)
	garch_101	2	0.0427725	0.230372	#N/A	0.73661	#N/A	-2012.4	2002.56	25.6907	-607.696	598.678	3.95337			0.0427725	0.230372		0.73661		-2012.4	2002.56	25.6907	-607.696	598.678	3.95337
		3	0.0427289	0.230441	#N/A	0.736719	#N/A	-2012.4	2002.56	25.6927	-607.69	598.673	3.95363			0.0427289	0.230441		0.736719		-2012.4	2002.56	25.6927	-607.69	598.673	3.95363
		4	0.0427657	0.230286	#N/A	0.736658	#N/A	-2012.41	2002.56	25.6907	-607.7	598.678	3.95316			0.0427657	0.230286		0.736658		-2012.41	2002.56	25.6907	-607.7	598.678	3.95316
		5	0.0420801	0.22637	#N/A	0.738296	#N/A	0	2002.52	25.6831	0	598.918	3.94359			0.0420801	0.22637		0.738296			2002.52	25.6831		598.918	3.94359
		6	0.042668	0.231342	#N/A	0.738357	#N/A	0	2002.67	25.7228	0	598.433	3.95737			0.042668	0.231342		0.738357			2002.67	25.7228		598.433	3.95737
																				GJR(1,1,1)
	gjr_111	2	0.0435803	0.107959	0.292139	0.721407	#N/A	-1988.71	1976.08	27.2139	-604.563	592.906	4.49203			0.0435803	0.107959	0.292139	0.721407		-1988.71	1976.08	27.2139	-604.563	592.906	4.49203
		3	0.0435512	0.108283	0.292868	0.721278	#N/A	-1988.7	1976.09	27.2431	-604.559	592.905	4.49741			0.0435512	0.108283	0.292868	0.721278		-1988.7	1976.09	27.2431	-604.559	592.905	4.49741
		4	0.0435598	0.108209	0.293002	0.721115	#N/A	-1988.7	1976.08	27.2385	-604.585	592.926	4.49723			0.0435598	0.108209	0.293002	0.721115		-1988.7	1976.08	27.2385	-604.585	592.926	4.49723
		5	0.0423834	0.10767	0.28919	0.722384	#N/A	0	1976.03	27.1431	0	593.289	4.47596			0.0423834	0.10767	0.28919	0.722384			1976.03	27.1431		593.289	4.47596
		6	0.0434389	0.109131	0.293967	0.723376	#N/A	0	1976.24	27.3862	0	592.579	4.51475			0.0434389	0.109131	0.293967	0.723376			1976.24	27.3862		592.579	4.51475
																				GJR(1,1,2)
	gjr_112	2	0.0446283	0.115714	0.323089	0.654536	0.04878	-1988.39	1976.12	27.8157	-604.333	593.675	4.63817			0.0446283	0.115714	0.323089	0.654536	0.04878	-1988.39	1976.12	27.8157	-604.333	593.675	4.63817
		3	0.044647	0.115271	0.321739	0.65346	0.0501613	-1988.38	1976.1	27.7672	-604.321	593.654	4.62846			0.044647	0.115271	0.321739	0.65346	0.0501613	-1988.38	1976.1	27.7672	-604.321	593.654	4.62846
		4	0.044666	0.115558	0.322698	0.653346	0.0499656	-1988.39	1976.11	27.7975	-604.347	593.664	4.63468			0.044666	0.115558	0.322698	0.653346	0.0499656	-1988.39	1976.11	27.7975	-604.347	593.664	4.63468
		5	0.0437258	0.110272	0.300876	0.672157	0.0409283	0	1976.01	27.2675	0	593.377	4.51511			0.0437258	0.110272	0.300876	0.672157	0.0409283		1976.01	27.2675		593.377	4.51511
		6	0.0443804	0.114204	0.320971	0.669617	0.0362792	0	1976.12	27.7781	0	593.628	4.6289			0.0443804	0.114204	0.320971	0.669617	0.0362792		1976.12	27.7781		593.628	4.6289
																				EGARCH(1,0,1)
	egarch_101	2	-0.00332742	0.414223	#N/A	0.929165	#N/A	-2033.15	2017.67	26.8396	-613.73	599.432	3.93112			-0.00332742	0.414223		0.929165		-2033.15	2017.67	26.8396	-613.73	599.432	3.93112
		3	-0.00334486	0.41611	#N/A	0.928615	#N/A	-2033.16	2017.69	26.8367	-613.678	599.444	3.93285			-0.00334486	0.41611		0.928615		-2033.16	2017.69	26.8367	-613.678	599.444	3.93285
		4	-0.00334288	0.416267	#N/A	0.928564	#N/A	-2033.16	2017.69	26.8367	-613.671	599.444	3.93299			-0.00334288	0.416267		0.928564		-2033.16	2017.69	26.8367	-613.671	599.444	3.93299
		5	-0.00320265	0.406309	#N/A	0.931567	#N/A	0	2017.64	26.8575	0	599.374	3.92278			-0.00320265	0.406309		0.931567			2017.64	26.8575		599.374	3.92278
		6	-0.00312886	0.415293	#N/A	0.929184	#N/A	0	2017.68	26.8194	0	599.444	3.93227			-0.00312886	0.415293		0.929184			2017.68	26.8194		599.444	3.93227
																				EGARCH(1,1,1)
	egarch_111	2	-0.0149402	0.350284	-0.171229	0.929576	#N/A	-1995.54	1974.97	26.1927	-608.059	589.076	4.12822			-0.0149402	0.350284	-0.171229	0.929576		-1995.54	1974.97	26.1927	-608.059	589.076	4.12822
		3	-0.0152177	0.364154	-0.174198	0.926155	#N/A	-1995.69	1975.21	26.2307	-608.097	589.579	4.17068			-0.0152177	0.364154	-0.174198	0.926155		-1995.69	1975.21	26.2307	-608.097	589.579	4.17068
		4	-0.0152571	0.363975	-0.174163	0.926134	#N/A	-1995.69	1975.21	26.2336	-608.093	589.574	4.17004			-0.0152571	0.363975	-0.174163	0.926134		-1995.69	1975.21	26.2336	-608.093	589.574	4.17004
		5	-0.0147523	0.339942	-0.169262	0.932332	#N/A	0	1974.92	26.1652	0	588.652	4.09396			-0.0147523	0.339942	-0.169262	0.932332			1974.92	26.1652		588.652	4.09396
		6	-0.0152028	0.35032	-0.171514	0.929311	#N/A	0	1974.98	26.2078	0	589.091	4.12887			-0.0152028	0.35032	-0.171514	0.929311			1974.98	26.2078		589.091	4.12887
																				EGARCH(1,1,2)
	egarch_112	2	-0.0149214	0.35495	-0.172641	0.917286	0.0113746	-1998.67	1975.03	26.2345	-610.848	589.168	4.14285			-0.0149214	0.35495	-0.172641	0.917286	0.0113746	-1998.67	1975.03	26.2345	-610.848	589.168	4.14285
		3	-0.0156848	0.394921	-0.185245	0.85864	0.0612969	-1999.55	1976	26.5718	-611.098	590.33	4.29081			-0.0156848	0.394921	-0.185245	0.85864	0.0612969	-1999.55	1976	26.5718	-611.098	590.33	4.29081
		4	-0.0156317	0.394941	-0.185703	0.855223	0.0646547	-1999.55	1976.01	26.5894	-611.083	590.299	4.29285			-0.0156317	0.394941	-0.185703	0.855223	0.0646547	-1999.55	1976.01	26.5894	-611.083	590.299	4.29285
		5	-0.0146669	0.335267	-0.166342	0.954592	-0.0215665	0	1974.9	26.1127	0	588.628	4.0777			-0.0146669	0.335267	-0.166342	0.954592	-0.0215665		1974.9	26.1127		588.628	4.0777
		6	-0.014903	0.350787	-0.170808	0.925207	0.00420037	0	1974.99	26.2139	0	589.072	4.12751			-0.014903	0.350787	-0.170808	0.925207	0.00420037		1974.99	26.2139		589.072	4.12751
																				FIGARCH(0,1,1)
			w	phi_1	d_1	beta_1		tr_lb	tr_ll	tr_mse	te_lb	te_ll	te_mse			$\bar{\omega}$	$\phi$	$d$
	figarch_001	2	0.0996448	#N/A	0.647314	0.417552	#N/A	-2007.5	2000.06	25.6709	-604.274	598.356	3.97824			0.0996448		0.647314	0.417552		-2007.5	2000.06	25.6709	-604.274	598.356	3.97824
		3	0.0997237	#N/A	0.647926	0.418095	#N/A	-2007.5	2000.06	25.6719	-604.264	598.361	3.97849			0.0997237		0.647926	0.418095		-2007.5	2000.06	25.6719	-604.264	598.361	3.97849
		4	0.0996946	#N/A	0.647947	0.418285	#N/A	-2007.5	2000.06	25.6729	-604.275	598.358	3.97817			0.0996946		0.647947	0.418285		-2007.5	2000.06	25.6729	-604.275	598.358	3.97817
		5	0.102365	#N/A	0.656875	0.432063	#N/A	0	2000.02	25.7218	0	598.132	3.97067			0.102365		0.656875	0.432063			2000.02	25.7218		598.132	3.97067
		6	0.0994093	#N/A	0.656193	0.421953	#N/A	0	2000.13	25.6656	0	598.654	3.98863			0.0994093		0.656193	0.421953			2000.13	25.6656		598.654	3.98863
																				FIGARCH(1,1,1)
	figarch_101	2	0.0998152	0.05925	0.663455	0.481325	#N/A	-2007.62	1999.69	25.7733	-604.743	598.445	3.98802			0.0998152	0.05925	0.663455	0.481325		-2007.62	1999.69	25.7733	-604.743	598.445	3.98802
		3	0.0997217	0.0592428	0.662841	0.480829	#N/A	-2007.62	1999.69	25.7726	-604.723	598.44	3.98768			0.0997217	0.0592428	0.662841	0.480829		-2007.62	1999.69	25.7726	-604.723	598.44	3.98768
		4	0.0997324	0.0590954	0.662664	0.480308	#N/A	-2007.62	1999.69	25.7708	-604.729	598.445	3.98809			0.0997324	0.0590954	0.662664	0.480308		-2007.62	1999.69	25.7708	-604.729	598.445	3.98809
		5	0.100277	0.062157	0.655716	0.479968	#N/A	0	1999.67	25.7835	0	598.181	3.97931			0.100277	0.062157	0.655716	0.479968			1999.67	25.7835		598.181	3.97931
		6	0.0994297	0.0595068	0.668713	0.483457	#N/A	0	1999.74	25.7665	0	598.652	3.99555			0.0994297	0.0595068	0.668713	0.483457			1999.74	25.7665		598.652	3.99555
																$\beta_0$	$\beta_1$	$\beta_2$	$\beta_3$	HAR
	har		1.07809	0.488434	0.420422	-0.0116591	4.9274	-5082.83	-5060.65	24.179	-1240.01	-1220.23	18.8574			1.07809	0.488434	0.420422	-0.0116591		-5082.83	-5060.65	24.179	-1240.01	-1220.23	18.8574
			1.06321	0.488359	0.420757	-0.0109266	4.92803	-5083.02	-5060.65	24.179	-1240.3	-1220.26	18.8597			1.06321	0.488359	0.420757	-0.0109266		-5083.02	-5060.65	24.179	-1240.3	-1220.26	18.8597
			1.0782	0.488435	0.420436	-0.0116791	4.92759	-5082.83	-5060.65	24.179	-1240	-1220.23	18.8575			1.0782	0.488435	0.420436	-0.0116791		-5082.83	-5060.65	24.179	-1240	-1220.23	18.8575
			1.08457	0.490612	0.421471	-0.0156697	4.93205	-5085.54	-5060.68	24.1794	-1242.81	-1220.4	18.867			1.08457	0.490612	0.421471	-0.0156697		-5085.54	-5060.68	24.1794	-1242.81	-1220.4	18.867
			1.06732	0.493247	0.419893	-0.0156461	4.93227	-5085.61	-5060.7	24.18	-1242.97	-1220.42	18.8688			1.06732	0.493247	0.419893	-0.0156461		-5085.61	-5060.7	24.18	-1242.97	-1220.42	18.8688
			1.0845	0.490324	0.421497	-0.015379	4.93223	-5085.54	-5060.67	24.1793	-1242.81	-1220.4	18.8663			1.0845	0.490324	0.421497	-0.015379		-5085.54	-5060.67	24.1793	-1242.81	-1220.4	18.8663
			1.06736	0.489342	0.419599	-0.0107199	4.91883	0	-5060.64	24.179	0	-1220.04	18.8554			1.06736	0.489342	0.419599	-0.0107199			-5060.64	24.179		-1220.04	18.8554
			1.07906	0.488399	0.420415	-0.0116575	4.91721	0	-5060.63	24.179	0	-1220.03	18.8571			1.07906	0.488399	0.420415	-0.0116575			-5060.63	24.179		-1220.03	18.8571

## Sheet: Latex
								Train			Test
			$\omega$	$\alpha$	$\gamma$	$\beta_1$	$\beta_2$	$\LB\br{\theta^\star}$	$p\br{y\vert \theta^\star}$	MSE	$\LB\br{\theta^\star}$	$p\br{y\vert \theta^\star}$	MSE
							ARCH
		EMGVB	0.518629	0.640169				-2247.14	-2241.03	29.8183	-651.11	-645.747	5.4467
		MGVB	0.51865	0.64016				-2247.14	-2241.03	29.8182	-651.107	-645.745	5.44666
		QBVI	0.518662	0.639891				-2247.14	-2241.03	29.8153	-651.105	-645.744	5.44541
		MCMC	0.519346	0.628169					-2241.01	29.6941		-645.661	5.39096
		ML	0.51883	0.64033					-2241.04	29.82		-645.726	5.44749
							GARCH(1,0,1)
		EMGVB	0.0427725	0.230372		0.73661		-2012.4	-2002.56	25.6907	-607.696	-598.678	3.95337
		MGVB	0.0427289	0.230441		0.736719		-2012.4	-2002.56	25.6927	-607.69	-598.673	3.95363
		QBVI	0.0427657	0.230286		0.736658		-2012.41	-2002.56	25.6907	-607.7	-598.678	3.95316
		MCMC	0.0420801	0.22637		0.738296			-2002.52	25.6831		-598.918	3.94359
		ML	0.042668	0.231342		0.738357			-2002.67	25.7228		-598.433	3.95737
							GJR(1,1,1)
		EMGVB	0.0435803	0.107959	0.292139	0.721407		-1988.71	-1976.08	27.2139	-604.563	-592.906	4.49203
		MGVB	0.0435512	0.108283	0.292868	0.721278		-1988.7	-1976.09	27.2431	-604.559	-592.905	4.49741
		QBVI	0.0435598	0.108209	0.293002	0.721115		-1988.7	-1976.08	27.2385	-604.585	-592.926	4.49723
		MCMC	0.0423834	0.10767	0.28919	0.722384			-1976.03	27.1431		-593.289	4.47596
		ML	0.0434389	0.109131	0.293967	0.723376			-1976.24	27.3862		-592.579	4.51475
							GJR(1,1,2)
		EMGVB	0.0446283	0.115714	0.323089	0.654536	0.04878	-1988.39	-1976.12	27.8157	-604.333	-593.675	4.63817
		MGVB	0.044647	0.115271	0.321739	0.65346	0.0501613	-1988.38	-1976.1	27.7672	-604.321	-593.654	4.62846
		QBVI	0.044666	0.115558	0.322698	0.653346	0.0499656	-1988.39	-1976.11	27.7975	-604.347	-593.664	4.63468
		MCMC	0.0437258	0.110272	0.300876	0.672157	0.0409283		-1976.01	27.2675		-593.377	4.51511
		ML	0.0443804	0.114204	0.320971	0.669617	0.0362792		-1976.12	27.7781		-593.628	4.6289
							EGARCH(1,0,1)
		EMGVB	-0.00332742	0.414223		0.929165		-2033.15	-2017.67	26.8396	-613.73	-599.432	3.93112
		MGVB	-0.00334486	0.41611		0.928615		-2033.16	-2017.69	26.8367	-613.678	-599.444	3.93285
		QBVI	-0.00334288	0.416267		0.928564		-2033.16	-2017.69	26.8367	-613.671	-599.444	3.93299
		MCMC	-0.00320265	0.406309		0.931567			-2017.64	26.8575		-599.374	3.92278
		ML	-0.00312886	0.415293		0.929184			-2017.68	26.8194		-599.444	3.93227
							EGARCH(1,1,1)
		EMGVB	-0.0149402	0.350284	-0.171229	0.929576		-1995.54	-1974.97	26.1927	-608.059	-589.076	4.12822
		MGVB	-0.0152177	0.364154	-0.174198	0.926155		-1995.69	-1975.21	26.2307	-608.097	-589.579	4.17068
		QBVI	-0.0152571	0.363975	-0.174163	0.926134		-1995.69	-1975.21	26.2336	-608.093	-589.574	4.17004
		MCMC	-0.0147523	0.339942	-0.169262	0.932332			-1974.92	26.1652		-588.652	4.09396
		ML	-0.0152028	0.35032	-0.171514	0.929311			-1974.98	26.2078		-589.091	4.12887
							EGARCH(1,1,2)
		EMGVB	-0.0149214	0.35495	-0.172641	0.917286	0.0113746	-1998.67	-1975.03	26.2345	-610.848	-589.168	4.14285
		MGVB	-0.0156848	0.394921	-0.185245	0.85864	0.0612969	-1999.55	-1976	26.5718	-611.098	-590.33	4.29081
		QBVI	-0.0156317	0.394941	-0.185703	0.855223	0.0646547	-1999.55	-1976.01	26.5894	-611.083	-590.299	4.29285
		MCMC	-0.0146669	0.335267	-0.166342	0.954592	-0.0215665		-1974.9	26.1127		-588.628	4.0777
		ML	-0.014903	0.350787	-0.170808	0.925207	0.00420037		-1974.99	26.2139		-589.072	4.12751
							FIGARCH(0,1,1)
			$\bar{\omega}$	$\phi$	$d$	$\beta_1$
		EMGVB	0.0996448		0.647314	0.417552		-2007.5	-2000.06	25.6709	-604.274	-598.356	3.97824
		MGVB	0.0997237		0.647926	0.418095		-2007.5	-2000.06	25.6719	-604.264	-598.361	3.97849
		QBVI	0.0996946		0.647947	0.418285		-2007.5	-2000.06	25.6729	-604.275	-598.358	3.97817
		MCMC	0.102365		0.656875	0.432063			-2000.02	25.7218		-598.132	3.97067
		ML	0.0994093		0.656193	0.421953			-2000.13	25.6656		-598.654	3.98863
							FIGARCH(1,1,1)
		EMGVB	0.0998152	0.05925	0.663455	0.481325		-2007.62	-1999.69	25.7733	-604.743	-598.445	3.98802
		MGVB	0.0997217	0.0592428	0.662841	0.480829		-2007.62	-1999.69	25.7726	-604.723	-598.44	3.98768
		QBVI	0.0997324	0.0590954	0.662664	0.480308		-2007.62	-1999.69	25.7708	-604.729	-598.445	3.98809
		MCMC	0.100277	0.062157	0.655716	0.479968			-1999.67	25.7835		-598.181	3.97931
		ML	0.0994297	0.0595068	0.668713	0.483457			-1999.74	25.7665		-598.652	3.99555
			$\beta_0$	$\beta_1$	$\beta_2$	$\beta_3$	HAR
		EMGVB	1.07809	0.488434	0.420422	-0.0116591		-5082.83	-5060.65	24.179	-1240.01	-1220.23	18.8574
		MGVB	1.06321	0.488359	0.420757	-0.0109266		-5083.02	-5060.65	24.179	-1240.3	-1220.26	18.8597
		QBVI	1.0782	0.488435	0.420436	-0.0116791		-5082.83	-5060.65	24.179	-1240	-1220.23	18.8575
		EMGVB$^\dag$	1.08457	0.490612	0.421471	-0.0156697		-5085.54	-5060.68	24.1794	-1242.81	-1220.4	18.867
		MGVB$^\dag$	1.06732	0.493247	0.419893	-0.0156461		-5085.61	-5060.7	24.18	-1242.97	-1220.42	18.8688
		QBVI$^\dag$	1.0845	0.490324	0.421497	-0.015379		-5085.54	-5060.67	24.1793	-1242.81	-1220.4	18.8663
		MCMC	1.06736	0.489342	0.419599	-0.0107199			-5060.64	24.179		-1220.04	18.8554
		ML	1.07906	0.488399	0.420415	-0.0116575			-5060.63	24.179		-1220.03	18.8571
