# Supplementary material
Source: ML conference proceedings conference paper supplement (https://openreview.net/forum?id=a30kyHbuXfI)
Supplement: supplementary_material [file Latex.xlsx]

## Sheet: estimates
		$\beta_0$	$\beta_1$	$\beta_2$	$\beta_3$	$\beta_4$	$\beta_5$	$\beta_6$	$\beta_7$	$\sigma$
	Full	0.00106997	0.0980546	0.0788142	-0.271586	-0.167864	-0.353915	1.16509	0.943494	0.0140399
	Diagonal	0.00104024	0.0541081	0.107296	-0.211136	0.135152	-0.00766746	0.518845	0.888173	0.0141975
	Block 1	0.00107368	0.0980167	0.0787467	-0.271791	-0.167423	-0.353446	1.16403	0.943645	0.0140362
	Block 2	0.00102673	0.0658816	0.126823	-0.204547	0.243855	0.225318	0.188076	0.84435	0.0144038
	ML	0.00107254	0.098581	0.0778262	-0.273217	-0.173507	-0.363104	1.17941	0.946258	0.013999
		Train			Test
		$\LB\br{\theta^\star}$	$p\br{y\vert \theta^\star}$	MSE	$p\br{y\vert \theta^\star}$	MSE
	Full	1186.08	1223.7	0.194125	316.849	0.0414853
	Diagonal	1177.81	1219.06	0.19838	317.042	0.0410925
	Block 1	1186.08	1223.7	0.194125	316.848	0.0414914
	Block 2	1173.85	1213.51	0.203572	316.696	0.041109
	ML		1223.73	0.194123	316.871	0.0415151

## Sheet: cov_full_ml
			$\beta0$	$\beta1$	$\beta2$	$\beta3$	$\beta4$	$\beta5$	$\beta6$	$\beta7$
		$\beta0$		#REF!	#REF!	#REF!	#REF!	#REF!	#REF!	#REF!
		$\beta1$	#REF!		#REF!	#REF!	#REF!	#REF!	#REF!	#REF!
		$\beta2$	#REF!	#REF!		#REF!	#REF!	#REF!	#REF!	#REF!
		$\beta3$	#REF!	#REF!	#REF!		#REF!	#REF!	#REF!	#REF!
		$\beta4$	#REF!	#REF!	#REF!	#REF!		#REF!	#REF!	#REF!
		$\beta5$	#REF!	#REF!	#REF!	#REF!	#REF!		#REF!	#REF!
		$\beta6$	#REF!	#REF!	#REF!	#REF!	#REF!	#REF!		#REF!
		$\beta7$	#REF!	#REF!	#REF!	#REF!	#REF!	#REF!	#REF!
		$\sigma$	#REF!	#REF!	#REF!	#REF!	#REF!	#REF!	#REF!	#REF!
			full													Block 1
		ml	0	0.00113728	0.00265997	-0.000589132	-0.00160305	-0.00146339	0.00596804	-0.00908539	-0.000108723				Block 2	0	0.000818161	0.00250822	-0.00055748	-0.00152379	-0.00155417	0.00605499	-0.00870751	0
			0.000892827	0	-0.0464923	-2.96988	-1.85793	-0.788517	-0.185783	1.60337	0.00904625					0	0	0.0150179	-2.95268	-1.90485	-0.742843	-0.181297	1.54717	0
			0.00251514	-0.031642	0	1.09401	0.310195	0.69091	-0.40885	-4.13721	0.00990331					0	0.142449	0	1.07098	0.322478	0.65183	-0.420329	-4.1737	0
			-0.000623978	-2.99222	1.09413	0	0.896607	0.595865	-0.949448	-4.69324	-0.0171016					0	-2.9805	-0.363988	0	0.952679	0.615357	-1.09222	-4.66923	0
			-0.00196653	-1.90561	0.296633	0.960632	0	3.68722	-20.2461	-0.538421	-0.0318498					0	0	0	0	0	3.85755	-20.5605	-0.631639	0
			-0.00163904	-0.729055	0.679018	0.622314	3.83562	0	-28.3766	-1.36375	0.0322028					0	0	0	0	-8.49006	0	-28.4092	-1.40761	0
			0.00673042	-0.170101	-0.393489	-1.06508	-20.4774	-28.8132	0	-3.42566	-0.00359244					0	0	0	0	0	0	0	-3.19455	0
			-0.00877783	1.60491	-4.14841	-4.69976	-0.563178	-1.38639	-3.32431	0	0.0168832					0	0	0	0	0	0	-4.32467	0	0
			Full
			$\beta_0$	$\beta_1$	$\beta_2$	$\beta_3$	$\beta_4$	$\beta_5$	$\beta_6$	$\beta_7$	$\sigma$
	ML	$\beta_0$		0.00113728	0.00265997	-0.000589132	-0.00160305	-0.00146339	0.00596804	-0.00908539	-0.000108723
		$\beta_1$	0.000892827		-0.0464923	-2.96988	-1.85793	-0.788517	-0.185783	1.60337	0.00904625
		$\beta_2$	0.00251514	-0.031642		1.09401	0.310195	0.69091	-0.40885	-4.13721	0.00990331
		$\beta_3$	-0.000623978	-2.99222	1.09413		0.896607	0.595865	-0.949448	-4.69324	-0.0171016
		$\beta_4$	-0.00196653	-1.90561	0.296633	0.960632		3.68722	-20.2461	-0.538421	-0.0318498
		$\beta_5$	-0.00163904	-0.729055	0.679018	0.622314	3.83562		-28.3766	-1.36375	0.0322028
		$\beta_6$	0.00673042	-0.170101	-0.393489	-1.06508	-20.4774	-28.8132		-3.42566	-0.00359244
		$\beta_7$	-0.00877783	1.60491	-4.14841	-4.69976	-0.563178	-1.38639	-3.32431		0.0168832
			Block 1
			$\beta_0$	$\beta_1$	$\beta_2$	$\beta_3$	$\beta_4$	$\beta_5$	$\beta_6$	$\beta_7$	$\sigma$
	Block 2	$\beta_0$		0.000818161	0.00250822	-0.00055748	-0.00152379	-0.00155417	0.00605499	-0.00870751
		$\beta_1$			0.0150179	-2.95268	-1.90485	-0.742843	-0.181297	1.54717
		$\beta_2$		0.142449		1.07098	0.322478	0.65183	-0.420329	-4.1737
		$\beta_3$		-2.9805	-0.363988		0.952679	0.615357	-1.09222	-4.66923
		$\beta_4$						3.85755	-20.5605	-0.631639
		$\beta_5$					-8.49006		-28.4092	-1.40761
		$\beta_6$								-3.19455
		$\beta_7$							-4.32467

## Sheet: Var
		0.000468836	5.61004	3.17437	5.32366	16.8042	27.4243	52.8678	15.3232	1.17042
		0.00050584	1.90951	1.77945	1.86048	2.15161	2.66228	2.25661	3.40558	1.21125
		0.000469437	5.5992	3.19925	5.36077	16.9962	27.3204	53.1487	15.2778	1.18366
		0.00051162	4.43424	2.00926	3.86899	8.51731	11.1674	4.95749	7.79823	1.16964
		0.000466505	5.60914	3.17077	5.36106	16.8933	27.6761	53.5142	15.2832	0
		$\beta_0$	$\beta_1$	$\beta_2$	$\beta_3$	$\beta_4$	$\beta_5$	$\beta_6$	$\beta_7$	$\sigma$
	Full	0.000468836	5.61004	3.17437	5.32366	16.8042	27.4243	52.8678	15.3232	1.17042
	Diagonal	0.00050584	1.90951	1.77945	1.86048	2.15161	2.66228	2.25661	3.40558	1.21125
	Block 1	0.000469437	5.5992	3.19925	5.36077	16.9962	27.3204	53.1487	15.2778	1.18366
	Block 2	0.00051162	4.43424	2.00926	3.86899	8.51731	11.1674	4.95749	7.79823	1.16964
	ML	0.000466505	5.60914	3.17077	5.36106	16.8933	27.6761	53.5142	15.2832
