# Supplementary material
Source: ML conference proceedings conference paper supplement (https://openreview.net/forum?id=a30kyHbuXfI)
Supplement: supplementary_material [file Latex.xlsx]

## Sheet: Par
	$\beta_0$	$\beta_1$	$\beta_2$	$\beta_3$	$\beta_4$	$\beta_5$	$\beta_6$	$\beta_7$
EMGVB	0.682272	-1.48867	-0.0847192	-0.575232	0.492493	-0.642056	0.610904	0.0452288
MGVB	0.682253	-1.48865	-0.0847166	-0.575225	0.492489	-0.642054	0.6109	0.0452401
QBVI	0.682285	-1.48877	-0.0847174	-0.575249	0.492514	-0.642076	0.610925	0.0452443
EMGVB $h$-fun.	0.678032	-1.4871	-0.083996	-0.574341	0.492763	-0.638388	0.609132	0.0480687
MGVB $h$-fun.	0.678011	-1.48708	-0.0839932	-0.574335	0.492758	-0.638388	0.60913	0.0480824
QBVI $h$-fun.	0.678035	-1.48711	-0.0839964	-0.574342	0.492764	-0.638389	0.609133	0.048068
EMGVB diag.	0.577845	-1.43101	-0.0566387	-0.541698	0.493267	-0.637141	0.59265	0.103647
MGVB diag.	0.575756	-1.42999	-0.0561691	-0.54122	0.493229	-0.637616	0.592829	0.105093
QBVI diag.	0.578886	-1.43168	-0.0569395	-0.542053	0.493268	-0.637111	0.592746	0.103155
EMGVB $h$-fun. diag.	0.575283	-1.43089	-0.0571164	-0.54296	0.492545	-0.634853	0.593098	0.107281
MGVB $h$-fun. diag.	0.573	-1.42978	-0.0566025	-0.54244	0.492505	-0.635363	0.593285	0.108855
QBVI $h$-fun. diag.	0.576235	-1.43147	-0.057391	-0.543281	0.492541	-0.634798	0.593161	0.106802
MCMC	0.678598	-1.487	-0.0839911	-0.573779	0.493127	-0.638045	0.606887	0.0474796
ML	0.678999	-1.47619	-0.0847958	-0.570607	0.484862	-0.625157	0.598992	0.0448702

## Sheet: Perf
	$\LB\br{\theta^\star}$	$\log p\br{y \vert \theta^\star}$	$\mathbb{E}_{q_{\br{\theta^\star}}}\sbr{\log q\br{\theta}}$	Accuracy	Precision	Recall	f1	$\LB\br{\theta^\star}$	$\log p\br{y \vert \theta^\star}$	Accuracy	Precision	Recall	f1
EMGVB	-356.642	-332.992	5.44088	0.712766	0.712187	0.703062	0.707595	-134.814	-113.854	0.698413	0.678921	0.673611	0.676256
MGVB	-356.642	-332.991	5.44235	0.712766	0.712187	0.703062	0.707595	-134.814	-113.854	0.698413	0.678921	0.673611	0.676256
QBVI	-356.642	-332.992	5.42664	0.712766	0.712187	0.703062	0.707595	-134.804	-113.854	0.698413	0.678921	0.673611	0.676256
EMGVB $h$-fun.	-356.635	-332.99	5.35123	0.710993	0.710147	0.701454	0.705774	-134.805	-113.855	0.698413	0.678921	0.673611	0.676256
MGVB $h$-fun.	-356.635	-332.99	5.35168	0.710993	0.710147	0.701454	0.705774	-134.805	-113.855	0.698413	0.678921	0.673611	0.676256
QBVI $h$-fun.	-356.635	-332.99	5.3511	0.710993	0.710147	0.701454	0.705774	-134.805	-113.855	0.698413	0.678921	0.673611	0.676256
EMGVB diag.	-358.423	-333.124	7.15888	0.710993	0.710147	0.701454	0.705774	-136.864	-114.171	0.666667	0.644238	0.639957	0.64209
MGVB diag.	-358.428	-333.129	7.15919	0.710993	0.710147	0.701454	0.705774	-136.871	-114.178	0.666667	0.644238	0.639957	0.64209
QBVI diag.	-358.419	-333.121	7.15344	0.710993	0.710147	0.701454	0.705774	-136.857	-114.167	0.666667	0.644238	0.639957	0.64209
EMGVB $h$-fun. diag.	-358.421	-333.127	7.10883	0.70922	0.70812	0.699846	0.703959	-136.876	-114.22	0.666667	0.644238	0.639957	0.64209
MGVB $h$-fun. diag.	-358.427	-333.133	7.10918	0.70922	0.70812	0.699846	0.703959	-136.883	-114.228	0.666667	0.644238	0.639957	0.64209
QBVI $h$-fun. diag.	-358.418	-333.124	7.1059	0.70922	0.70812	0.699846	0.703959	-136.871	-114.217	0.666667	0.644238	0.639957	0.64209
MCMC		-332.99		0.710993	0.710147	0.701454	0.705774		-113.838	0.698413	0.678921	0.673611	0.676256
ML		-332.983		0.70922	0.708442	0.699478	0.703931		-113.8	0.70922	0.708442	0.699478	0.703931

## Sheet: Cov
		$\beta_0$	$\beta_1$	$\beta_2$	$\beta_3$	$\beta_4$	$\beta_5$	$\beta_6$	$\beta_7$
	&$\beta_0$		-0.0163925	-0.00847817	-0.00696798	0.00163422	0.00262308	0.00192406	-0.027087
	&$\beta_1$	-0.0163373		0.00298113	0.0142497	-0.00451472	-0.000204246	0.000840877	-0.00117831
	&$\beta_2$	-0.0081047	0.00288145		0.00413322	0.000655112	0.000503218	-0.00064351	-0.00109298
	&$\beta_3$	-0.00700293	0.0139313	0.00405892		0.0003899	0.00127685	-0.00188818	-0.00397273
	&$\beta_4$	0.000766716	-0.00361052	0.00127234	0.000827792		-0.00134649	-0.00258535	-0.00190842
	&$\beta_5$	0.00311895	-0.000512488	7.62768e-05	0.000684346	-0.00144441		-0.0132156	-0.00611222
	&$\beta_6$	0.00176232	0.000725934	-0.000213269	-0.000957071	-0.00230324	-0.0120244		-0.000279325
	&$\beta_7$	-0.0280934	-0.000483231	-0.00102914	-0.00380549	-0.00218194	-0.00633414	-0.00072557
		$\beta_0$	$\beta_1$	$\beta_2$	$\beta_3$	$\beta_4$	$\beta_5$	$\beta_6$	$\beta_7$
	&$\beta_0$		-0.0157792	-0.00799658	-0.00683724	0.00067061	0.00317933	0.00194336	-0.0270149
	&$\beta_1$	-0.0151029		0.00274457	0.0137822	-0.00422302	-0.000272043	0.000741408	-0.000836159
	&$\beta_2$	-0.00791461	0.00248783		0.00393299	0.0010175	0.000235131	-0.000577367	-0.000926924
	&$\beta_3$	-0.00653885	0.0130658	0.00380949		0.00067477	0.00116602	-0.00164169	-0.00352397
	&$\beta_4$	0.000469971	-0.0041369	0.0011098	0.000717621		-0.00172324	-0.00264719	-0.00108679
	&$\beta_5$	0.00334329	-0.000493859	5.82322e-05	0.000890268	-0.00177169		-0.0128577	-0.00613123
	&$\beta_6$	0.00171669	0.00111305	-0.000356436	-0.00137442	-0.00265756	-0.0128212		-0.000971285
	&$\beta_7$	-0.0260299	-0.000849564	-0.000970051	-0.0034891	-0.00119081	-0.00590301	-0.0010169

## Sheet: Var
	$\beta_0$	$\beta_1$	$\beta_2$	$\beta_3$	$\beta_4$	$\beta_5$	$\beta_6$	$\beta_7$
EMGVB	0.0424165	0.0546495	0.00600929	0.0147872	0.0121974	0.0193143	0.018793	0.0447707
MGVB	0.0424031	0.0557382	0.00614553	0.0150646	0.0128799	0.0212653	0.0192661	0.0439299
QBVI	0.0425531	0.0548361	0.0060298	0.0148417	0.0122384	0.0193833	0.018863	0.0449285
EMGVB$^\dag$	0.0406771	0.0541459	0.00594396	0.0146362	0.012898	0.0204295	0.0196759	0.0438492
MGVB$^\dag$	0.040694	0.0541642	0.00597516	0.0146884	0.012869	0.0205764	0.0197415	0.0438735
QBVI$^\dag$	0.0406781	0.0541483	0.00594409	0.0146366	0.0128984	0.0204302	0.0196764	0.0438502
EMGVB diag.	0.00908826	0.0335633	0.0025486	0.00894612	0.00988153	0.00954776	0.00993551	0.0128618
MGVB diag.	0.009087	0.0335556	0.00254818	0.008945	0.00988123	0.00954982	0.00993442	0.0128612
QBVI diag.	0.00910035	0.0336325	0.00255142	0.00895681	0.00989239	0.00956273	0.0099466	0.01288
EMGVB$^\dag$ diag.	0.00870862	0.0339075	0.00252046	0.0089687	0.010511	0.009995	0.0100622	0.0131341
MGVB$^\dag$ diag.	0.00870729	0.0338991	0.00252001	0.00896747	0.0105106	0.00999734	0.0100609	0.0131334
QBVI$^\dag$ diag.	0.00871543	0.0339424	0.00252193	0.00897386	0.0105164	0.010001	0.0100703	0.0131469
MCMC	0.0396682	0.0536437	0.00588714	0.014065	0.0127383	0.0207127	0.019661	0.0424756
ML	0.0407871	0.054357	0.00589187	0.0145743	0.0127618	0.0205942	0.0196049	0.0439274

## Sheet: Tab_Par
		$\beta_0$	$\beta_1$	$\beta_2$	$\beta_3$	$\beta_4$	$\beta_5$	$\beta_6$	$\beta_7$
	EMGVB	0.682272	-1.48867	-0.0847192	-0.575232	0.492493	-0.642056	0.610904	0.0452288
	MGVB	0.682253	-1.48865	-0.0847166	-0.575225	0.492489	-0.642054	0.6109	0.0452401
	QBVI	0.682285	-1.48877	-0.0847174	-0.575249	0.492514	-0.642076	0.610925	0.0452443
	EMGVB$^\dag$	0.678032	-1.4871	-0.083996	-0.574341	0.492763	-0.638388	0.609132	0.0480687
	MGVB$^\dag$	0.678011	-1.48708	-0.0839932	-0.574335	0.492758	-0.638388	0.60913	0.0480824
	QBVI$^\dag$	0.678035	-1.48711	-0.0839964	-0.574342	0.492764	-0.638389	0.609133	0.048068
	EMGVB$^\text{diag.}$	0.577845	-1.43101	-0.0566387	-0.541698	0.493267	-0.637141	0.59265	0.103647
	MGVB$^\text{diag.}$	0.575756	-1.42999	-0.0561691	-0.54122	0.493229	-0.637616	0.592829	0.105093
	QBVI$^\text{diag.}$	0.578886	-1.43168	-0.0569395	-0.542053	0.493268	-0.637111	0.592746	0.103155
	EMGVB$^{\dag \, \text{diag.}}$	0.575283	-1.43089	-0.0571164	-0.54296	0.492545	-0.634853	0.593098	0.107281
	MGVB$^{\dag \, \text{diag.}}$	0.573	-1.42978	-0.0566025	-0.54244	0.492505	-0.635363	0.593285	0.108855
	QBVI$^{\dag \, \text{diag.}}$	0.576235	-1.43147	-0.057391	-0.543281	0.492541	-0.634798	0.593161	0.106802
	MCMC	0.678598	-1.487	-0.0839911	-0.573779	0.493127	-0.638045	0.606887	0.0474796
	ML	0.678999	-1.47619	-0.0847958	-0.570607	0.484862	-0.625157	0.598992	0.0448702

## Sheet: Tab_Perf
		$\LB\br{\theta^\star}$	$\log p\br{y \vert \theta^\star}$	$\mathbb{E}_{q_{\br{\theta^\star}}}\sbr{\log q\br{\theta}}$	Accuracy	Precision	Recall	f1	$\LB\br{\theta^\star}$	$\log p\br{y \vert \theta^\star}$	Accuracy	Precision	Recall	f1
	EMGVB	-356.642	-332.992	5.44088	0.712766	0.712187	0.703062	0.707595	-134.814	-113.854	0.698413	0.678921	0.673611	0.676256
	MGVB	-356.642	-332.991	5.44235	0.712766	0.712187	0.703062	0.707595	-134.814	-113.854	0.698413	0.678921	0.673611	0.676256
	QBVI	-356.642	-332.992	5.42664	0.712766	0.712187	0.703062	0.707595	-134.804	-113.854	0.698413	0.678921	0.673611	0.676256
	EMGVB$^\dag$	-356.635	-332.99	5.35123	0.710993	0.710147	0.701454	0.705774	-134.805	-113.855	0.698413	0.678921	0.673611	0.676256
	MGVB$^\dag$	-356.635	-332.99	5.35168	0.710993	0.710147	0.701454	0.705774	-134.805	-113.855	0.698413	0.678921	0.673611	0.676256
	QBVI$^\dag$	-356.635	-332.99	5.3511	0.710993	0.710147	0.701454	0.705774	-134.805	-113.855	0.698413	0.678921	0.673611	0.676256
	EMGVB$^\text{diag.}$	-358.423	-333.124	7.15888	0.710993	0.710147	0.701454	0.705774	-136.864	-114.171	0.666667	0.644238	0.639957	0.64209
	MGVB$^\text{diag.}$	-358.428	-333.129	7.15919	0.710993	0.710147	0.701454	0.705774	-136.871	-114.178	0.666667	0.644238	0.639957	0.64209
	QBVI$^\text{diag.}$	-358.419	-333.121	7.15344	0.710993	0.710147	0.701454	0.705774	-136.857	-114.167	0.666667	0.644238	0.639957	0.64209
	EMGVB$^\dag$$^\text{diag.}$	-358.421	-333.127	7.10883	0.70922	0.70812	0.699846	0.703959	-136.876	-114.22	0.666667	0.644238	0.639957	0.64209
	MGVB$^\dag$$^\text{diag.}$	-358.427	-333.133	7.10918	0.70922	0.70812	0.699846	0.703959	-136.883	-114.228	0.666667	0.644238	0.639957	0.64209
	QBVI$^\dag$$^\text{diag.}$	-358.418	-333.124	7.1059	0.70922	0.70812	0.699846	0.703959	-136.871	-114.217	0.666667	0.644238	0.639957	0.64209
	MCMC		-332.99		0.710993	0.710147	0.701454	0.705774		-113.838	0.698413	0.678921	0.673611	0.676256
	ML		-332.983		0.70922	0.708442	0.699478	0.703931		-113.8	0.70922	0.708442	0.699478	0.703931
		Train
		$\LB\brt{\theta^\star}$	$\log p\br{y \vert \theta^\star}$	Accuracy	Precision	Recall	f1
	EMGVB	-356.642	-332.992	0.712766	0.712187	0.703062	0.707595
	MGVB	-356.642	-332.991	0.712766	0.712187	0.703062	0.707595
	QBVI	-356.642	-332.992	0.712766	0.712187	0.703062	0.707595
	EMGVB$^\dag$	-356.635	-332.99	0.710993	0.710147	0.701454	0.705774
	MGVB$^\dag$	-356.635	-332.99	0.710993	0.710147	0.701454	0.705774
	QBVI$^\dag$	-356.635	-332.99	0.710993	0.710147	0.701454	0.705774
	EMGVB$^\text{diag.}$	-358.423	-333.124	0.710993	0.710147	0.701454	0.705774
	MGVB$^\text{diag.}$	-358.428	-333.129	0.710993	0.710147	0.701454	0.705774
	QBVI$^\text{diag.}$	-358.419	-333.121	0.710993	0.710147	0.701454	0.705774
	EMGVB$^{\dag \, \text{diag.}}$	-358.421	-333.127	0.70922	0.70812	0.699846	0.703959
	MGVB$^{\dag \, \text{diag.}}$	-358.427	-333.133	0.70922	0.70812	0.699846	0.703959
	QBVI$^{\dag \, \text{diag.}}$	-358.418	-333.124	0.70922	0.70812	0.699846	0.703959
	MCMC		-332.99	0.710993	0.710147	0.701454	0.705774
	ML		-332.983	0.70922	0.708442	0.699478	0.703931
		Test
		$\LB\brt{\theta^\star}$	$\log p\br{y \vert \theta^\star}$	Accuracy	Precision	Recall	f1
	EMGVB	-134.814	-113.854	0.698413	0.678921	0.673611	0.676256
	MGVB	-134.814	-113.854	0.698413	0.678921	0.673611	0.676256
	QBVI	-134.804	-113.854	0.698413	0.678921	0.673611	0.676256
	EMGVB$^\dag$	-134.805	-113.855	0.698413	0.678921	0.673611	0.676256
	MGVB$^\dag$	-134.805	-113.855	0.698413	0.678921	0.673611	0.676256
	QBVI$^\dag$	-134.805	-113.855	0.698413	0.678921	0.673611	0.676256
	EMGVB$^\text{diag.}$	-136.864	-114.171	0.666667	0.644238	0.639957	0.64209
	MGVB$^\text{diag.}$	-136.871	-114.178	0.666667	0.644238	0.639957	0.64209
	QBVI$^\text{diag.}$	-136.857	-114.167	0.666667	0.644238	0.639957	0.64209
	EMGVB$^{\dag \, \text{diag.}}$	-136.876	-114.22	0.666667	0.644238	0.639957	0.64209
	MGVB$^{\dag \, \text{diag.}}$	-136.883	-114.228	0.666667	0.644238	0.639957	0.64209
	QBVI$^{\dag \, \text{diag.}}$	-136.871	-114.217	0.666667	0.644238	0.639957	0.64209
	MCMC		-113.838	0.698413	0.678921	0.673611	0.676256
	ML		-113.8	0.70922	0.708442	0.699478	0.703931

## Sheet: Tab_Cov
		$\beta_0$	$\beta_1$	$\beta_2$	$\beta_3$	$\beta_4$	$\beta_5$	$\beta_6$	$\beta_7$
	&$\beta_0$		-1.63925	-0.847817	-0.696798	0.163422	0.262308	0.192406	-2.7087
	&$\beta_1$	-1.63373		0.298113	1.42497	-0.451472	-0.0204246	0.0840877	-0.117831
	&$\beta_2$	-0.81047	0.288145		0.413322	0.0655112	0.0503218	-0.064351	-0.109298
	&$\beta_3$	-0.700293	1.39313	0.405892		0.03899	0.127685	-0.188818	-0.397273
	&$\beta_4$	0.0766716	-0.361052	0.127234	0.0827792		-0.134649	-0.258535	-0.190842
	&$\beta_5$	0.311895	-0.0512488	0.00762768	0.0684346	-0.144441		-1.32156	-0.611222
	&$\beta_6$	0.176232	0.0725934	-0.0213269	-0.0957071	-0.230324	-1.20244		-0.0279325
	&$\beta_7$	-2.80934	-0.0483231	-0.102914	-0.380549	-0.218194	-0.633414	-0.072557
		$\beta_0$	$\beta_1$	$\beta_2$	$\beta_3$	$\beta_4$	$\beta_5$	$\beta_6$	$\beta_7$
	&$\beta_0$		-1.57792	-0.799658	-0.683724	0.067061	0.317933	0.194336	-2.70149
	&$\beta_1$	-1.51029		0.274457	1.37822	-0.422302	-0.0272043	0.0741408	-0.0836159
	&$\beta_2$	-0.791461	0.248783		0.393299	0.10175	0.0235131	-0.0577367	-0.0926924
	&$\beta_3$	-0.653885	1.30658	0.380949		0.067477	0.116602	-0.164169	-0.352397
	&$\beta_4$	0.0469971	-0.41369	0.11098	0.0717621		-0.172324	-0.264719	-0.108679
	&$\beta_5$	0.334329	-0.0493859	0.00582322	0.0890268	-0.177169		-1.28577	-0.613123
	&$\beta_6$	0.171669	0.111305	-0.0356436	-0.137442	-0.265756	-1.28212		-0.0971285
	&$\beta_7$	-2.60299	-0.0849564	-0.0970051	-0.34891	-0.119081	-0.590301	-0.10169

## Sheet: Tab_Var
		$\beta_0$	$\beta_1$	$\beta_2$	$\beta_3$	$\beta_4$	$\beta_5$	$\beta_6$	$\beta_7$
	EMGVB	4.24165	5.46495	0.600929	1.47872	1.21974	1.93143	1.8793	4.47707
	MGVB	4.24031	5.57382	0.614553	1.50646	1.28799	2.12653	1.92661	4.39299
	QBVI	4.25531	5.48361	0.60298	1.48417	1.22384	1.93833	1.8863	4.49285
	EMGVB$^\dag$	4.06771	5.41459	0.594396	1.46362	1.2898	2.04295	1.96759	4.38492
	MGVB$^\dag$	4.0694	5.41642	0.597516	1.46884	1.2869	2.05764	1.97415	4.38735
	QBVI$^\dag$	4.06781	5.41483	0.594409	1.46366	1.28984	2.04302	1.96764	4.38502
	EMGVB$^\text{diag.}$	0.908826	3.35633	0.25486	0.894612	0.988153	0.954776	0.993551	1.28618
	MGVB$^\text{diag.}$	0.9087	3.35556	0.254818	0.8945	0.988123	0.954982	0.993442	1.28612
	QBVI$^\text{diag.}$	0.910035	3.36325	0.255142	0.895681	0.989239	0.956273	0.99466	1.288
	EMGVB$^{\dag \, \text{diag.}}$	0.870862	3.39075	0.252046	0.89687	1.0511	0.9995	1.00622	1.31341
	MGVB$^{\dag \, \text{diag.}}$	0.870729	3.38991	0.252001	0.896747	1.05106	0.999734	1.00609	1.31334
	QBVI$^{\dag \, \text{diag.}}$	0.871543	3.39424	0.252193	0.897386	1.05164	1.0001	1.00703	1.31469
	MCMC	3.96682	5.36437	0.588714	1.4065	1.27383	2.07127	1.9661	4.24756
	ML	4.07871	5.4357	0.589187	1.45743	1.27618	2.05942	1.96049	4.39274

## Sheet: Tab_n
	$S$	$t$	$\beta_0$	$\beta_1$	$\beta_2$	$\beta_3$	$\beta_4$	$\beta_5$	$\beta_6$	$\beta_7$	$\LB\br{\theta_0}$
	10	5.1034	0.687415	-1.49846	-0.0858581	-0.575512	0.500043	-0.635852	0.605165	0.0373102	-430.216
	20	6.98352	0.681866	-1.49755	-0.0852023	-0.570577	0.499021	-0.640989	0.606926	0.0431457	-429.626
	30	8.13673	0.683707	-1.49318	-0.0872135	-0.573255	0.495182	-0.639592	0.609396	0.0431767	-434.863
	50	9.0148	0.680149	-1.49213	-0.0846557	-0.575632	0.493778	-0.642607	0.611496	0.0474637	-435.89
	75	11.7877	0.682272	-1.48867	-0.0847192	-0.575232	0.492493	-0.642056	0.610904	0.0452288	-436.282
	100	14.652	0.682127	-1.48961	-0.0848415	-0.573901	0.493283	-0.639421	0.608772	0.0442505	-436.924
	150	22.8624	0.680226	-1.48841	-0.0845956	-0.574456	0.49234	-0.639247	0.608752	0.0455755	-436.759
	200	24.1686	0.680566	-1.48706	-0.0847148	-0.574357	0.492119	-0.638094	0.608219	0.0458359	-437.036
	300	31.7084	0.680446	-1.48787	-0.0845397	-0.574899	0.492827	-0.638029	0.608891	0.0459869	-436.529
		Train
	$S$	$\LB\br{\theta^\star}$	$\log p\br{y \vert \theta^\star}$	Accuracy	Precision	Recall	f1
	10	-356.687	-332.991	0.710993	0.710147	0.701454	0.705774
	20	-356.667	-332.994	0.712766	0.712187	0.703062	0.707595
	30	-356.653	-332.99	0.70922	0.708442	0.699478	0.703931
	50	-356.645	-332.988	0.712766	0.712187	0.703062	0.707595
	75	-356.642	-332.992	0.712766	0.712187	0.703062	0.707595
	100	-356.64	-332.988	0.710993	0.710147	0.701454	0.705774
	150	-356.64	-332.99	0.710993	0.710147	0.701454	0.705774
	200	-356.638	-332.99	0.712766	0.712187	0.703062	0.707595
	300	-356.639	-332.989	0.710993	0.710147	0.701454	0.705774
		Test
	$S$	$\LB\br{\theta^\star}$	$\log p\br{y \vert \theta^\star}$	Accuracy	Precision	Recall	f1
	10	-134.865	-113.91	0.698413	0.678921	0.673611	0.676256
	20	-134.899	-113.856	0.698413	0.678921	0.673611	0.676256
	30	-134.793	-113.827	0.698413	0.678921	0.673611	0.676256
	50	-134.805	-113.838	0.698413	0.678921	0.673611	0.676256
	75	-134.814	-113.854	0.698413	0.678921	0.673611	0.676256
	100	-134.81	-113.876	0.698413	0.678921	0.673611	0.676256
	150	-134.791	-113.845	0.698413	0.678921	0.673611	0.676256
	200	-134.788	-113.84	0.698413	0.678921	0.673611	0.676256
	300	-134.832	-113.842	0.698413	0.678921	0.673611	0.676256
