# Supplementary material
Source: ML conference proceedings conference paper supplement (https://openreview.net/forum?id=a30kyHbuXfI)
Supplement: supplementary_material [file LR_tables.xls]

## Sheet: var
0.000468836	5.61004	3.17437	5.32366	16.8042	27.4243	52.8678	15.3232	1.17042
0.00050584	1.90951	1.77945	1.86048	2.15161	2.66228	2.25661	3.40558	1.21125
0.000469437	5.5992	3.19925	5.36077	16.9962	27.3204	53.1487	15.2778	1.18366
0.00051162	4.43424	2.00926	3.86899	8.51731	11.1674	4.95749	7.79823	1.16964
0.000466505	5.60914	3.17077	5.36106	16.8933	27.6761	53.5142	15.2832

## Sheet: c_b1_b2
0	0.000818161	0.00250822	-0.00055748	-0.00152379	-0.00155417	0.00605499	-0.00870751	0
0	0	0.0150179	-2.95268	-1.90485	-0.742843	-0.181297	1.54717	0
0	0.142449	0	1.07098	0.322478	0.65183	-0.420329	-4.1737	0
0	-2.9805	-0.363988	0	0.952679	0.615357	-1.09222	-4.66923	0
0	0	0	0	0	3.85755	-20.5605	-0.631639	0
0	0	0	0	-8.49006	0	-28.4092	-1.40761	0
0	0	0	0	0	0	0	-3.19455	0
0	0	0	0	0	0	-4.32467	0	0
0	0	0	0	0	0	0	0	0

## Sheet: c_fu_ml
0	0.00113728	0.00265997	-0.000589132	-0.00160305	-0.00146339	0.00596804	-0.00908539	-0.000108723
0.000892827	0	-0.0464923	-2.96988	-1.85793	-0.788517	-0.185783	1.60337	0.00904625
0.00251514	-0.031642	0	1.09401	0.310195	0.69091	-0.40885	-4.13721	0.00990331
-0.000623978	-2.99222	1.09413	0	0.896607	0.595865	-0.949448	-4.69324	-0.0171016
-0.00196653	-1.90561	0.296633	0.960632	0	3.68722	-20.2461	-0.538421	-0.0318498
-0.00163904	-0.729055	0.679018	0.622314	3.83562	0	-28.3766	-1.36375	0.0322028
0.00673042	-0.170101	-0.393489	-1.06508	-20.4774	-28.8132	0	-3.42566	-0.00359244
-0.00877783	1.60491	-4.14841	-4.69976	-0.563178	-1.38639	-3.32431	0	0.0168832

## Sheet: mat_stat
LB	ll_train	mse_train	mse_test	ll_test
1186.08	1223.7	0.000194125	4.14853e-05	316.849
1177.81	1219.06	0.00019838	4.10925e-05	317.042
1186.08	1223.7	0.000194125	4.14914e-05	316.848
1173.85	1213.51	0.000203572	4.1109e-05	316.696
	1223.73	0.000194123	4.15151e-05	316.871

## Sheet: mat_mu
0.00106997	0.0980546	0.0788142	-0.271586	-0.167864	-0.353915	1.16509	0.943494	0.0140399
0.00104024	0.0541081	0.107296	-0.211136	0.135152	-0.00766746	0.518845	0.888173	0.0141975
0.00107368	0.0980167	0.0787467	-0.271791	-0.167423	-0.353446	1.16403	0.943645	0.0140362
0.00102673	0.0658816	0.126823	-0.204547	0.243855	0.225318	0.188076	0.84435	0.0144038
0.00107254	0.098581	0.0778262	-0.273217	-0.173507	-0.363104	1.17941	0.946258	0.013999
